1 **Disruption of vacuolin microdomains in the host *Dictyostelium discoideum***  
2 **increases resistance to *Mycobacterium marinum*-induced membrane**  
3 **damage and infection**

4 Cristina Bosmani, Angélique Perret, Florence Leuba, Aurélie Guého, Nabil Hanna and Thierry  
5 Soldati\*

6

7 <sup>1</sup>Département de Biochimie, Faculté des Sciences, Université de Genève, Sciences II, 30 quai Ernest Ansermet,  
8 CH-1211 Genève-4, Switzerland

9

10 \*Corresponding author

11 Thierry.Soldati@unige.ch

12 Tel: +41-22-379- 6496

13

14 **ABSTRACT**

15 *Mycobacterium tuberculosis* (Mtb), the causative agent of tuberculosis, manipulates the host  
16 phagosome maturation pathway to replicate intracellularly. *Mycobacterium marinum*, a closely-related  
17 species, and *Dictyostelium discoideum*, a social amoeba and alternative phagocytic host, have been  
18 used as models to study host-pathogen interactions occurring during mycobacterial infections.  
19 Vacuolins, functional homologues of the mammalian flotillins, organize membrane microdomains and  
20 play a role in vesicular trafficking. Various pathogens have been reported to manipulate their  
21 membrane association and function. During infection of *D. discoideum* with *M. marinum*, Vacuolin C  
22 was specifically and highly induced and all three vacuolin isoforms were enriched at the  
23 mycobacteria-containing-vacuole (MCV). In addition, absence of vacuolins reduced escape from the  
24 MCV and conferred resistance to *M. marinum* infection. Moreover, ESAT-6, the membrane-disrupting  
25 virulence factor of *M. marinum*, was less associated with membranes when vacuolins were absent.  
26 Together, these results suggest that vacuolins are important host factors that are manipulated by  
27 mycobacteria to inflict membrane damage and escape from their compartment.

28

29

30

31

32

33 **KEYWORDS**

34 *Dictyostelium discoideum*, *Mycobacterium marinum*, vacuolins, flotillins, membrane damage,  
35 infection resistance, escape

## 36 INTRODUCTION

37 Tuberculosis, an infectious disease caused by the pathogen *Mycobacterium tuberculosis* (Mtb), is the  
38 1<sup>st</sup> cause of death by an infectious disease worldwide and killed 1.4 million people in 2019 (World  
39 Health Organization, 2021). Alveolar macrophages are the first line of defense against Mtb, as they  
40 take them up by phagocytosis in the lungs to restrict infection. However, Mtb is able to manipulate the  
41 phagosomal maturation pathway to eventually establish a replicative niche inside a modified  
42 phagosome (Russell, 2001, 2007). *Mycobacterium marinum*, closely related to Mtb, causes a disease  
43 similar to tuberculosis in marine and freshwater vertebrates. *M. marinum* has been widely used as an  
44 experimentally versatile model for Mtb, owing to its faster replication time, easier laboratory  
45 manipulation and conserved virulence factors (Stinear et al., 2008; Tobin and Ramakrishnan, 2008).

46 *Dictyostelium discoideum*, a social amoeba, uses phagocytosis to feed on soil bacteria. The  
47 phagosomal maturation pathway is extremely well conserved between *D. discoideum* and animal cells  
48 (Boulais et al., 2010). After uptake, bacteria are enclosed in a compartment called a phagosome, which  
49 matures through a series of fusion and fission events. In the phagosome, bacteria are exposed to acidic  
50 pH, proteolytic enzymes, reactive oxygen species (ROS) and toxic levels of metals (Cosson and Lima,  
51 2014; Dunn et al., 2018; Barisch et al., 2018; Hanna et al., 2021). These factors, also conserved  
52 between *D. discoideum* and mammals, are necessary to achieve killing and digestion of the ingested  
53 bacterium. Because of its ease-of-use and conserved phagosomal maturation pathway, *D. discoideum*  
54 has been widely used as a surrogate macrophage to study host interactions with intracellular pathogens  
55 (Cosson and Soldati, 2008; Bozzaro and Eichinger, 2011; Dunn et al., 2018).

56 The *D. discoideum* – *M. marinum* system has been previously established as a model to study  
57 mycobacterial infections (Solomon et al., 2003; Hagedorn and Soldati, 2007). Like Mtb, after uptake,  
58 *M. marinum* arrests phagosomal maturation to allow its replication, and eventually escapes from the  
59 compartment in an ESX-1-dependent manner (Lewis et al., 2003; Gao et al., 2004; Cardenal-Muñoz et  
60 al., 2018). Similarly to Mtb, *M. marinum* avoids acidification of the compartment by actively  
61 inhibiting association and/or inducing recycling of the vacuolar H<sup>+</sup>-ATPase (v-ATPase; (Wong et al.,  
62 2011; Kolonko et al., 2014)). This was shown to require the WASH complex-mediated actin  
63 polymerization on the MCV at early time points in both *D. discoideum* and macrophages (Kolonko et  
64 al., 2014). In addition, the MCV was shown to be almost devoid of cathepsin D and to have a low  
65 proteolytic activity (Hagedorn and Soldati, 2007; Cardenal-Muñoz et al., 2017). After establishing its  
66 niche, *M. marinum* proliferates in the MCV, which becomes more spacious and acquires  
67 postlysosomal proteins, such as the predicted copper transporter p80 (Kolonko et al., 2014). *M.*  
68 *marinum* eventually escapes from the compartment to access its nutrients and egress from the host cell  
69 (Hagedorn and Soldati, 2007; Hagedorn et al., 2009). Throughout the infection course and as early as

70 1.5 hours post infection (hpi), *M. marinum* perforates its compartment thanks to virulence factors,  
71 namely the ESAT-6 peptide, secreted through its Type VII secretion system (T7SS) ESX-1 (Cardenal-  
72 Muñoz et al., 2017; López-Jiménez et al., 2018). *M. marinum* lacking the ESX-1 secretion system  
73 ( $\Delta$ RD1 mutant) is unable to arrest phagosomal maturation and to grow efficiently intracellularly  
74 (Hagedorn and Soldati, 2007; Cardenal-Muñoz et al., 2017; López-Jiménez et al., 2018). Thus, the  
75 membrane damaging ability of *M. marinum* is a prerequisite for efficient replication inside its host.

76 Flotillin-1 and -2 are highly conserved proteins found in lipid rafts at the plasma membrane  
77 and phagosomes (Dermine et al., 2001; Morrow and Parton, 2005; Otto and Nichols, 2011). They  
78 insert into the cytosolic leaflet of membranes thanks to their PHB domain (prohibitin homology  
79 domain) and acylations at the N-terminus. In addition, coiled-coil regions at the C-terminus allow  
80 homo- and heterotetramerization and thus formation of specific membrane microdomains (Morrow et  
81 al., 2002; Neumann-Giesen et al., 2004; Solis et al., 2007). Flotillins have been proposed to function  
82 as signaling platforms and in membrane trafficking of cargoes (Babuke and Tikkanen, 2007; Stuermer,  
83 2011). Flotillin-1 is present on phagosomes and intracellular pathogens have been shown to interfere  
84 with its association with their vacuole. For instance, flotillin-1 is present at the *Brucella abortus*-  
85 containing compartment as well as the *Chlamydia pneumoniae* inclusion throughout infection  
86 (Arellano-Reynoso et al., 2005; Korhonen et al., 2012). In addition, *Anaplasma phagocytophilum*  
87 inclusions are also enriched with flotillins, and it was proposed that flotillins participate in trafficking  
88 of free cholesterol to allow replication of *A. phagocytophilum* (Xiong et al., 2019). Recently, flotillins  
89 were found to be associated with the *Pseudomonas aeruginosa* lectin LecA, and to be required for  
90 bacteria entry into the host cell, together with saturated long-chain fatty acids and the GPI-anchored  
91 protein CD59 (Brandel et al., 2021). On the other hand, the *Leishmania* parasite actively depletes  
92 flotillin-1 from its compartment by preventing phagosome-lysosome fusion (Dermine et al., 2001).  
93 Together, these results point to an important role of specific flotillin-enriched microdomains in host-  
94 pathogen interactions.

95 We, and others, have previously shown that the three *D. discoideum* vacuolins (VacA, B and  
96 C) are flotillin homologues (Jenne et al., 1998; Wienke et al., 2006; Bosmani et al., 2020). They share  
97 a similar protein structure, are able to oligomerize and behave as integral membrane proteins. All three  
98 vacuolins are found associated with membranes of different endocytic compartments, and accumulate  
99 at postlysosomes (Bosmani et al., 2020). Previously, VacB was shown to be important for *M. marinum*  
100 infection, as its absence impaired intracellular growth as well as allowed the v-ATPase to accumulate  
101 at the MCV (Hagedorn and Soldati, 2007). We have since then shown that the knock-out (KO) mutant  
102 previously used is in fact a multiple vacuolin KO, and have thus generated new vacuolin mutants in  
103 the Ax2(Ka) *D. discoideum* background (Bosmani et al., 2020). We subsequently showed that absence  
104 of vacuolins greatly affects uptake of various types of particles, including *M. marinum*, via reduced

105 expression of Myosin VII and impaired recognition and adhesion to particles. In addition, in absence  
106 of vacuolins, phagosomes had an earlier reneutralization phase; delivery and/or retrieval of certain  
107 lysosomal enzymes was affected, without any impact on bacteria killing (Bosmani et al., 2020).

108 In light of the roles recently proposed for vacuolins in *D. discoideum*, we sought to better  
109 dissect their link with the MCV and their role during *M. marinum* infection. We show here that VacC  
110 is highly induced upon *M. marinum* infection and that vacuolins associate with the MCV as early as 1  
111 hpi. Moreover, we confirm that absence of vacuolins confers resistance to infection, and propose that  
112 vacuolins are required for *M. marinum* to efficiently damage its compartment and escape to the  
113 cytosol where it continues to replicate.

## 114 **RESULTS**

### 115 **Vacuolin C is specifically induced upon *M. marinum* infection**

116 To test whether mycobacteria manipulate the expression of the three vacuolin isoforms during the  
117 course of the infection, the transcriptomic response of wild-type (wt) Ax2(Ka) cells infected with  
118 GFP-expressing *M. marinum* was analyzed as previously described (Hanna et al., 2019). The *vacC*  
119 gene, which is normally poorly expressed in vegetative cells (dictyExpress, (Stajdohar et al., 2017)),  
120 was consistently and significantly induced throughout the 48 hours of infection (**Fig. 1A**).  
121 Interestingly, *vacC* was highly induced as early as 1 hour post infection (hpi). On the other hand, *vacB*  
122 was only highly induced at 1 hpi, while expression of *vacA* was mostly upregulated at later time points  
123 (24-48 hpi). We wondered whether induction of *vacC* was specific to infection with mycobacteria, or a  
124 general response to bacteria phagocytosis. We analyzed the transcriptomic response of Ax2(Ka) and  
125 DH1 wt cells in contact for 4 hours with different Gram-positive and -negative bacteria, as well as  
126 different mycobacterial strains (**Fig. 1B**, (Lamrabet et al., 2020)). The *vacC* gene was not significantly  
127 expressed when cells were in contact with the Gram-positive or -negative strains tested, but  
128 consistently highly induced with mycobacteria (**Fig. 1B**). Moreover, the expression of *vacC* correlated  
129 with the pathogenicity of the mycobacterial strain, with the highest induction observed with wt *M.*  
130 *marinum*, and the lowest with *M. smegmatis*, a non-pathogenic mycobacterium. RNAseq results were  
131 overall confirmed by qRT-PCR (**Fig. 1C**). Note that, as *vacC* is a poorly expressed gene in basal  
132 conditions, the absolute fold change values reported here are higher than observed by RNAseq, due to  
133 the lower sensitivity of qRT-PCR. Contrary to the consistent upregulation of *vacC* with wt *M.*  
134 *marinum*, infection with the  $\Delta$ RD1 mutant and *M. smegmatis* induced *vacC* expression only at 1 hpi.  
135 At later time points, expression of *vacC* was mostly similar to levels observed in non-infected cells.  
136 To test whether the VacC protein was correspondingly upregulated upon *M. marinum* infection, the  
137 endogenous protein levels of each vacuolin was assessed by western blot using the previously

138 described chromosomal Vac-GFP knock-in strains (Vac-GFP KI, (Bosmani et al., 2020). The VacC  
139 protein accumulated from 6 hpi and significantly at 24 hpi, compared to mock-infected cells (NI, **Fig.**  
140 **1D-E**), whereas no significant upregulation was observed for VacA or VacB. In addition, VacC was  
141 only highly induced by infection with wt *M. marinum*, but not the  $\Delta$ RD1 mutant (**Fig. 1D-E**). Because  
142 we analyzed the level of expression in a heterogenous pool of cells (i.e. including infected and non-  
143 infected cells), the exact fold change of VacC was highly dependent on the percentage of infected  
144 cells. To confirm whether only infected cells showed an upregulation of VacC, infected Vac-GFP KI  
145 cells were imaged by high content microscopy (**Fig. 1F-G**), and levels of GFP intensity were  
146 measured in infected versus non-infected cells present in the same pool. The expression of VacC was  
147 consistently higher in cells infected with wt *M. marinum*, when compared to their non-infected  
148 neighbors. No difference in the VacC-GFP level was observed when cells were infected with the  
149  $\Delta$ RD1 mutant. These results show that VacC is a specific host reporter for the infection with *M.*  
150 *marinum*, and its high expression is possibly triggered by ESX-1 dependent damages.

#### 151 **Vacuolins are present at the *M. marinum*-containing vacuole**

152 It was previously shown that vacuolins decorate the *M. marinum* containing vacuole (MCV)  
153 throughout the infection course starting as early as 6 hpi (Hagedorn and Soldati, 2007), however, the  
154 anti-vacuolin (pan-vacuolin) antibody used recognizes all three isoforms (Bosmani et al., 2020). We  
155 therefore wanted to better dissect which vacuolin is mostly associated with the MCV and the dynamics  
156 of their recruitment at earlier time-points, given our RNAseq data (Fig.1). Vac-GFP KI cells were  
157 infected with mCherry-expressing *M. marinum*, and the dynamic of each vacuolin's recruitment was  
158 followed by live microscopy (**Fig. 2A-B**). Each vacuolin was present at the MCV as early as 1 hpi,  
159 with an average of 60% of MCVs being decorated with one of the vacuolins the first day of infection  
160 (**Fig. 2B**). Interestingly, we observed that the way vacuolins associated with the MCV membrane was  
161 different over time. In fact, at early time points, vacuolins exhibited a patchy distribution at the MCV,  
162 with only certain regions of the MCV harboring vacuolins (**Fig. 2A and C**). At 24 hpi, on the other  
163 hand, the whole MCV membrane was strongly enriched with each vacuolin, with about 75% of  
164 vacuolin-positive MCVs having a “solid” vacuolin coat (**Fig. 2C**). These results were confirmed using  
165 antibodies against the endogenous VacA and VacB, which were also found to be highly accumulated  
166 at the MCV membrane at 24 hpi (**Fig. S1**). Furthermore, at that stage of infection, the damage inflicted  
167 by *M. marinum* to its MCV became macroscopically obvious (**Fig. 2A**, arrowheads), and only about  
168 30-40% of MCVs had an intact vacuolin-coat (**Fig. 2D**). Overall, these results show that all three  
169 vacuolins are present at the MCV, as early as 1 hpi, and gradually accumulate at the MCV membrane  
170 until a solid “vacuolin-coat” completely envelops the compartment.

#### 171 **Absence of vacuolins confers resistance to *M. marinum* infection**

172 To characterize the role of vacuolins in the biogenesis of the MCV, we analyzed the impact of  
173 vacuolin gene deletions on the infection course with the newly described vacuolin KO mutants  
174 (Bosmani et al., 2020). We have previously shown that, despite a faster postlysosomal maturation,  
175 vacuolin KO mutants are able to grow on, kill and digest different Gram-negative and -positive  
176 bacteria, as efficiently as wt cells (Bosmani et al., 2020). To test whether growth on and killing of  
177 mycobacteria were affected upon vacuolin KO, different dilutions of vacuolin KO mutants and wt  
178 cells were plated on mycobacterial lawns and their capacity to form phagocytic plaques, i.e. to grow  
179 and digest the bacteria, was assessed (**Fig. 3A and S2**). We observed in particular, that absence of one  
180 or more vacuolins facilitated growth on *M. marinum* wt, with KO cells growing 10-fold better than wt  
181 cells (**Fig. 3A**). On the other hand, vacuolin KO conferred only a slight advantage for growth on lawns  
182 of less pathogenic mycobacteria but with no correlation with the pathogenicity, as for instance KO  
183 cells grew better on *M. smegmatis* lawns rather than on *M. marinum*  $\Delta$ RD1. To test whether absence  
184 of vacuolins impairs intracellular mycobacterial growth, we performed two different infection assays  
185 (**Fig. 3B and C**). Intracellular bacterial growth was measured either by luminescence using *lux*-  
186 expressing *M. marinum*, as previously described (Arafah et al., 2013), or by fluorescence using GFP-  
187 expressing *M. marinum*. Wt and vacuolin double or triple KO mutants ( $\Delta$ BC,  $\Delta$ ABC) were infected  
188 and, after removing extracellular bacteria, luminescence was measured in a plate reader (**Fig. 3B**) or  
189 fluorescence by flow cytometry (**Fig. 3C**). Initial levels of infection were measured in each  
190 experiment to ensure a comparable starting point of infection for each cell line, despite the phagocytic  
191 defect observed in vacuolin KO cells (Bosmani et al., 2020). We observed that, in absence of two or  
192 all three vacuolins, wt *M. marinum* was not able to grow as efficiently as in wt cells, in particular after  
193 24 hpi (**Fig. 3B-C**). After 72 hours of measurement, intracellular growth of *M. marinum* was reduced  
194 by at least 50% in vacuolin KO cells (**Fig. 3B-C**). In addition, infection experiments were performed  
195 with luminescent *M. marinum*  $\Delta$ RD1 mutant, and, as mentioned earlier (**Fig. 3A**), absence of  
196 vacuolins had no impact on the growth of this mutant bacterium (**Fig. 3B**). Moreover, with time, the  
197 percentage of infected vacuolin KO cells decreased faster than for wt cells (**Fig. 3D**). Normally, the  
198 percentage of infected cells decreases as cells grow and multiply, thus diluting the number of infected  
199 cells. But, after 24 hpi, infection level of  $\Delta$ BC cells was 75% lower than wt, despite similar cell  
200 growth (**Fig. 3E**), perhaps indicating an active “curing” of *M. marinum* infection. In conclusion,  
201 vacuolins are important susceptibility factors, as their depletion confers resistance to infection with *M.*  
202 *marinum*.

### 203 **Vacuolins are not involved in manipulating acidification or proteolysis of the MCV**

204 Resistance to infection can be attributed to different causes (**Fig. S3A-B**): (i) a more bactericidal  
205 compartment that may kill more efficiently the pathogen, (ii) premature escape from the MCV and  
206 subsequent capture by xenophagy, (iii) early release of the pathogen from the host cell, (iv)

207 compromised access to nutrients and thus impaired growth, or (iv) incapacity to damage the MCV,  
208 and hence reduced escape to the nutrient-rich cytosol. To investigate at which step vacuolins are  
209 involved during infection, and how their absence may confer resistance, we infected wt and vacuolin  
210 KO cells with fluorescent *M. marinum* and characterized the MCV by immunofluorescence and time-  
211 lapse microscopy (**Fig. 4 and 5**).

212 The v-ATPase is actively depleted from *M. tuberculosis* and *M. marinum*-containing  
213 compartments (Hagedorn and Soldati, 2007; Wong et al., 2011). In addition, proteolytic enzymes have  
214 been involved in resistance against intracellular pathogens, namely, *M. tuberculosis* regulates the  
215 expression of several cathepsins which otherwise would hinder its growth in macrophages (Pires et al.,  
216 2016). We first assayed whether absence of vacuolins might render the MCV more acidic (**Fig. 4-B**).  
217 The v-ATPase subunit VatA was present at about 50% of MCVs at 6 hpi, but was almost completely  
218 absent from MCVs after 24 hpi. No significant difference in v-ATPase content or depletion from the  
219 MCV was observed in wt compared with  $\Delta$ ABC cells (**Fig. 4A**). To measure acidity in the MCV itself,  
220 we incubated cells with the pH-dependent LysoSensor Green probe, which fluoresces in acidic  
221 compartments (**Fig. 4B**). In accordance with the previous result, the percentage of acidic  
222 compartments throughout the infection reflected well the number of VatA-positive MCVs and no  
223 difference was observed between wt and  $\Delta$ ABC cells. This indicates that, in absence of vacuolins,  
224 MCVs are not more acidic. To assay whether the MCV is more proteolytic, we monitored delivery of  
225 cathepsin D in the MCV (**Fig. 4C**) and measured proteolysis in the MCV using DQGreen-BSA, which  
226 is self-quenched but fluoresces upon proteolytic cleavage of BSA and release of DQGreen in the  
227 lumen (**Fig. 4D**). Throughout the infection, about 25 to 35% of *M. marinum* colocalized with CathD in  
228 wt cell. Interestingly, only 7% of the MCVs colocalized with CathD at 6 hpi in  $\Delta$ ABC cells compared  
229 to over 25% in wt cells, although at later time points CathD association in vacuolin KO mutants was  
230 similar to wt (**Fig. 4C**). Furthermore, as was previously shown (Cardenal-Muñoz et al., 2017), the *M.*  
231 *marinum*-containing compartment was poorly proteolytic, with no more than 25% DQGreen-positive  
232 compartments throughout the infection course (**Fig. 4D**). No main difference between wt and vacuolin  
233 KO cells was observed, except at 6 hpi, as for CathD. In conclusion, these results show that *M.*  
234 *marinum* is not exposed to a more acidic or proteolytic environment in absence of vacuolins. We have  
235 previously shown that vacuolin KOs have a slightly faster lysosome biogenesis, with CathD being  
236 delivered and/or retrieved faster from the phagosome during maturation (Bosmani et al., 2020). Given  
237 the differences in proteolysis and CathD association at 6 hpi, we tested whether another lysosomal-  
238 postlysosomal marker, p80, was differentially associated with the MCV in wt compared to vacuolin  
239 KO cells (**Fig. 4E**). Interestingly, at 6 hpi, p80 was less associated with the MCV in  $\Delta$ ABC cells (50%  
240 vs 70% in wt cells), although this was not the case at later time points. Overall, a notable difference in  
241 the association of lysosomal and postlysosomal markers was only observed at early time points,  
242 probably reflecting vacuolins' role in lysosomal biogenesis. However, this phenotype is probably not



243 sufficient to explain the resistance caused by absence of vacuolins, and thus we sought to further  
244 dissect this mechanism.

#### 245 **Vacuolins are not involved in release of *M. marinum***

246 *M. marinum* can be released by the host cell by three mechanisms: cell death, exocytosis and a non-  
247 lytic actin-dependent egress termed ejection (Hagedorn et al., 2009; Cardenal-Muñoz et al., 2018). We  
248 reasoned that early release by any of these mechanisms may explain the lower percentage of infected  
249 cells, and thus the lower bacterial load, of vacuolin KO mutants. To test this, wt and  $\Delta$ ABC cells  
250 infected with GFP-expressing wt *M. marinum* or the  $\Delta$ RD1 mutant, which is released by exocytosis  
251 more efficiently and earlier than wt bacteria (López-Jiménez et al., 2019), were imaged by high-  
252 content microscopy every hour for 72 hours (**Fig. 4F-G**). Cells were incubated during the whole  
253 experiment in medium containing antibiotics to prevent extracellular bacterial growth, and the  
254 proportion of extracellular versus intracellular bacteria was measured. Although we observed release  
255 from the host cell as early as 3 hpi on average in wt cells, 50% of all imaged bacteria were found in  
256 the extracellular space at 27 hpi (**Fig. 4F**). In  $\Delta$ ABC cells, bacteria were released in a similar dynamic  
257 and extent, suggesting that *M. marinum* is not released faster from vacuolin KO mutants. The  $\Delta$ RD1  
258 *M. marinum* mutant, as expected, was released much faster from wt cells than wt bacteria (**Fig. 4G**).  
259 In this case, 50% of all imaged bacteria were found in the extracellular space as early as 5 hpi. In  
260  $\Delta$ ABC cells, the plateau was reached slightly faster, at 3 hpi. Nevertheless, these data suggest that  
261 early release is not a mechanism that fully explains the resistance to *M. marinum* wt infection in  
262 vacuolin KO mutants.

#### 263 **Absence of vacuolins impairs *M. marinum* escape from the MCV**

264 *M. marinum* resides inside the MCV and damages its membrane in an ESX-1-dependent manner,  
265 eventually resulting in escape to the cytosol (Cardenal-Muñoz et al., 2018; López-Jiménez et al.,  
266 2018). The  $\Delta$ RD1 *M. marinum* mutant, which is strongly weakened in inducing damage and escaping  
267 from its compartment, is also strongly attenuated in *D. discoideum* cells (Cardenal-Muñoz et al.,  
268 2017). Similarly, in *D. discoideum* cells impaired in repairing the ESX-1-dependent damage, *M.*  
269 *marinum* escapes faster to the cytosol but is rapidly recaptured by autophagy, thus inhibiting its  
270 growth (López-Jiménez et al., 2018). Therefore, both earlier escape to the cytosol or impaired escape  
271 can result in reduced bacterial growth and we hypothesized that vacuolins modulate *M. marinum*  
272 escape from or //retention inside the MCV. Ubiquitination of bacteria is one of the first signals of  
273 bacteria escape from the MCV and it triggers the recruitment of the autophagy machinery. In parallel,  
274 the ESCRT-III subunit Vps32 is found very early on damaged MCV membranes and mediates repair  
275 of membranes injuries inflicted by the ESX-1 secretion system (López-Jiménez et al., 2018). To

276 dissect the mechanism by which vacuolins impair bacteria escape, we monitored ubiquitin and Vps32  
277 recruitment at MCVs in wt and  $\Delta$ ABC cells (**Fig. 5A-D**). Ubiquitin was found to accumulate similarly  
278 in both cell lines, but to a lower extent (although not-significantly) in vacuolin KO mutants (**Fig. 5B**).  
279 Interestingly, the appearance of ubiquitin was quite different, especially in the first 12 hours of  
280 infection, with 65% of bacteria covered in ubiquitin patches in wt cells, and only 35% in  $\Delta$ ABC cells  
281 (**Fig. 5B**). On the other hand, GFP-Vps32 accumulated equally well in the vicinity of bacteria in wt  
282 compared to  $\Delta$ ABC cells (**Fig. 5C**), with only a small difference in the appearance of its recruitment  
283 (**Fig. 5D**). It was previously shown that the lipid droplet protein, perilipin (Plin), decorates bacteria  
284 once they gain access to the cytosol (Barisch et al., 2015), we thus monitored association of GFP-Plin  
285 with the bacteria in wt and  $\Delta$ ABC cells. (**Fig. 5E**). *M. marinum* was only poorly associated with Plin  
286 (15%) at 8 hpi in both wt cells and  $\Delta$ ABC, indicating that only a minor fraction of the bacteria is fully  
287 exposed to the cytosol at that stage, irrespective of the presence or absence of vacuolins. However,  
288 around 24 hpi, *M. marinum* gained access to the cytosol of wt cells and consequently was increasingly  
289 associated with GFP-Plin (45%). On the other hand, bacteria in  $\Delta$ ABC cells remained significantly  
290 less associated with GFP-Plin (15%). Together, these results suggest that in absence of vacuolins, *M.*  
291 *marinum* escapes less efficiently from the MCV, presumably by inflicting less membrane damage.

## 292 **ESAT-6-induced membrane damage requires vacuolins**

293 *M. marinum* induces membrane damage via the ESX-1-mediated secretion of the small peptide ESAT-  
294 6, which inserts into host membranes (Gao et al., 2004; de Jonge et al., 2007). We hypothesized that  
295 ESAT-6 inserts in specific membrane domains containing vacuolins. To test this, we assayed *in vitro*  
296 whether recombinant Mtb ESAT-6 is able to bind host membranes in presence or absence of vacuolins  
297 (**Figs. 6A and S4A-B**). Host membranes of wt cells were purified and incubated with rESAT-6 at  
298 different pH and with different membrane-to-rESAT-6 ratios (**Fig. S4A-B**). In our conditions, the best  
299 binding to wt membranes was observed at pH 6. This result is in accordance with the fact that the pH  
300 measured directly inside the MCV in *D. discoideum*, using *M. marinum* coated with FITC and TRITC,  
301 is around 6 during most of the infection course, contrary to the marked acidification monitored around  
302 an avirulent *M. marinum* mutant (**Fig. S4C**). We then incubated rESAT-6 with membranes from wt  
303 and  $\Delta$ ABC cells in these specific conditions, and observed a reduction of about 50% of rESAT-6  
304 association with membranes purified from vacuolin KO mutants (**Fig. 6A**). ESAT-6 is thought to  
305 prefer binding to ordered, cholesterol-rich membranes (de Jonge et al., 2007; Augenreich et al.,  
306 2017). We wondered whether vacuolins are also part of these microdomains, in analogy to flotillins  
307 that are known lipid raft markers. To test this, Vac-GFP KI or overexpressing (OE) cells were lysed in  
308 cold Triton X-100 and Triton-insoluble fractions (TIF) were further floated by centrifugation in a  
309 sucrose gradient (**Fig. S5**). Surprisingly, and contrary to flotillins, only a small fraction of each  
310 vacuolin isoform was visible in the TIFs. Nevertheless, we hypothesized that vacuolins might

311 associate more with ordered domains during infection (**Fig. 6B**). VacC-GFP KI cells were mock  
312 infected, or infected with wt *M. marinum*, and TSF and TIF/TIFF fractions were isolated. On average,  
313 VacC-GFP was found two-fold more enriched in TIF at 18 hpi than LmpB, a known marker of  
314 ordered domains in *D. discoideum* (Janssen et al., 2001). In conclusion, our results suggest that  
315 vacuolins, which are enriched in ordered domains during infection, may facilitate ESAT-6 insertion  
316 into host membranes, thus potentiating its membrane-damaging action.

## 317 **DISCUSSION**

318 In *D. discoideum*, vacuolins are integral membrane proteins that oligomerize and thus define  
319 specific microdomains of the phagosomal membrane (Bosmani et al., 2020). Here, we propose that  
320 vacuolins are host factors that are hijacked by the pathogenic *M. marinum* and required for the  
321 efficient membranolytic activity of its secreted peptide ESAT-6 involved in membrane damage and  
322 escape from the MCV.

323 Our data show that vacuolins, in particular VacC, are highly induced, both at the mRNA and protein  
324 levels throughout the infection with wt *M. marinum*, but not with  $\Delta$ RD1 or *M. smegmatis* (Fig. 1). We  
325 propose that VacC is mainly induced early on by mycobacteria species in general, perhaps resulting  
326 from recognition of specific mycobacterial pathogen associated molecular patterns (PAMPs).  
327 However, when the mycobacterium has a functional ESX-1 secretion system, induction of VacC is  
328 sustained, perhaps due to sensing of the damage caused by the secretion of membranolytic factors  
329 (Fig. 1C-F). Whether the induction of *vacC* is a host stress response or specifically and directly  
330 induced by pathogenic *M. marinum* remains to be determined. We also show that, while initially  
331 vacuolins are present at the MCV in patches, as the infection progresses, the bacterium becomes  
332 completely surrounded by a vacuolin-positive membrane (Fig. 2). Interestingly, MCVs exhibited a  
333 VacC-GFP positive coat earlier than with the other vacuolins. This could be a consequence of the  
334 higher expression of VacC during infection, or a higher tropism of this protein for the MCV.

335 We have previously described a role for VacB as a susceptibility factor involved in *M.*  
336 *marinum* infection (Hagedorn and Soldati, 2007). However, because the mutant used in that study was  
337 in fact a double vacuolin B and C KO (Bosmani et al., 2020), we present a more complete study and  
338 dissection of the role of all three vacuolins in the establishment of the *M. marinum* replicative niche.  
339 We confirm that absence of VacB, but also VacA or VacC, confers resistance to infection with *M.*  
340 *marinum* (Fig. 3). Interestingly, absence of vacuolin facilitates growth and plaque formation on a lawn  
341 of *M. marinum*, suggesting that vacuolin KO cells are more immune to the pathogenicity of *M.*  
342 *marinum* than wt cells (Fig. 3A). Importantly, we observe that growth on the  $\Delta$ RD1 *M. marinum*  
343 mutant is as impaired in wt cells as in vacuolin KO mutants (Fig. 3A-B). In other words, absence of

344 vacuolins seems to specifically impact growth of wt *M. marinum*, to a lesser extent that of *M.*  
345 *smegmatis*, but not of the  $\Delta$ RD1 mutant. This corroborates the hypothesis that vacuolins are  
346 specifically hijacked by *M. marinum* and involved in establishment of the *M. marinum* niche in an  
347 ESX-1 and membrane damage-dependent manner.

348 We had previously shown that absence of VacB facilitates the accumulation of the v-ATPase  
349 at the MCV and hypothesized that VacB was involved in preventing association and/or assisting in  
350 recycling of the v-ATPase (Hagedorn and Soldati, 2007). In the present study, however, we find that  
351 the MCV of vacuolin KO mutants is not more proteolytic nor more acidic than in wt cells (Fig. 4 A-  
352 D). This indicates that vacuolins are not involved in preventing acidification of the MCV, nor in  
353 rendering the compartment less proteolytic. In addition, bacteria do not egress faster from vacuolin  
354 KO mutants (Fig. 4 E-F) but appear to reside longer in a more intact MCV (Fig. 5E). In fact, our data  
355 show that vacuolin KO cells are more resistant to infection because *M. marinum* is less efficient at  
356 escaping from its compartment. These results reinforce the idea that escape to the cytosol is required  
357 for optimal growth of *M. marinum* in its host and vacuolins play an important role in modulating  
358 mycobacteria escape.

359 How do vacuolins participate in *M. marinum* escape from the MCV? One hypothesis is that  
360 less damage would be produced at the MCV in absence of vacuolin microdomains. Two markers of  
361 damage and repair at the MCV are ubiquitin and the ESCRT-III subunit Vps32, respectively (López-  
362 Jiménez et al., 2018). We show that in absence of vacuolins, ubiquitination in the vicinity of the  
363 bacterium, which is one of the earliest signs of damage, is slightly lower, and less important in the first  
364 12 hpi, suggesting that in absence of vacuolins damage is less extensive (Fig. 5A-B). However,  
365 surprisingly, this was not the case for Vps32 recruitment, as only a small non-significant change was  
366 observed between the patchiness and dotted morphology of the Vps32-positive areas (Fig. 5C-D).  
367 Therefore, our data might indicate that membrane repair is not affected by KO of vacuolins. On the  
368 other hand, because we measured the percentage of Vps32-positive bacteria, and since VacABC KO  
369 cells are by definition more resistant to infection, by 24 hpi, we are focusing on a subpopulation of  
370 cells that are still infected, while the majority of them are not anymore. However, taken together, our  
371 data about perilipin recruitment and ubiquitination lead us to conclude that in absence of vacuolins,  
372 bacteria escape less to the cytosol, probably as a consequence of inducing less membrane damage.

373 *M. marinum* and Mtb secrete ESAT-6, which has long been described as a pore-forming toxin  
374 (Gao et al., 2004; de Jonge et al., 2007; Leon et al., 2012; Augenstein and Briken, 2020). ESAT-6 is  
375 secreted together with CFP-10, its putative chaperone, through the ESX-1 secretion system. In order to  
376 damage the membrane, ESAT-6 first needs to dissociate from CFP-10, which occurs at low pH, and  
377 was recently shown to require acetylations of ESAT-6 (de Jonge et al., 2007; Aguilera et al., 2020).

378 Moreover, PDIMs (phthiocerol dimycocerosates), which are bacteria lipids, may activate ESAT-6 and  
379 participate in membrane damage (Augenstreich et al., 2017). During *M. marinum* infection of *D.*  
380 *discoideum* we did not monitor any significant drop in pH in the MCV for the average population of  
381 infected cells (Fig. S4C), probably due to early membrane damage caused by the bacterium leading to  
382 proton leakage. But our previously published results and those we present here, clearly document the  
383 fact that *M. marinum* experiences transient drops a of pH, resulting in a fraction of MCVs being  
384 LysoSensor-positive during the early stage of infection (Cardenal-Muñoz et al., 2017 and Fig. 4B).  
385 We assume that the drops in pH are transient, but are sufficient to trigger pH-dependent stimulation of  
386 genes such as Mag24-1 (Hagedorn and Soldati, 2007). As a consequence, the conditions that allow the  
387 dissociation of ESAT-6 from its chaperone are probably met. Alternatively, or in addition, we favour  
388 the idea that a host membrane component could facilitate the insertion of ESAT-6 in the MCV  
389 membrane. In that respect, it has been reported that ESAT-6 inserts into cholesterol-rich and ordered  
390 domains (de Jonge et al., 2007; Augenstreich et al., 2017), and we reason that vacuolins, which are  
391 functional homologues of flotillins, might be enriched in these domains. Indeed, and interestingly,  
392 while vacuolins were not enriched in Triton insoluble fractions at steady state in uninfected cells (Fig.  
393 S5), a significant increase in their association with these domains was observed after 16 hpi (Fig. 6B).  
394 This was reminiscent of our localization data (Fig. 2), which indicate that vacuolins are first present in  
395 small patches at the MCV but, as time progresses, they become highly enriched. This suggests that  
396 over time the lipid composition of the MCV undergoes significant changes, which may enable the  
397 bacterium to cause progressive and extensive damage that finally allows its escape. It is unclear,  
398 though, whether vacuolin enrichment is a cause or a consequence of this change.

399 Other pathogenic bacteria are known to require ordered domains in order to establish their  
400 infection. *Shigella flexneri* and *P. aeruginosa*, for example, co-opt the lipid rafts of their host  
401 membranes for their entry (Grassmé et al., 2003; Goot et al., 2004; Brandel et al., 2021). In addition, it  
402 was also proposed that these pathogens use lipid rafts to damage the compartment in which they  
403 reside. For instance, *S. flexneri* requires contact of its type three secretion system with the host lipid  
404 rafts to allow secretion of its virulence factors and thus induce membrane damage (Goot et al., 2004).  
405 Our data suggest that vacuolins, and possibly ordered domains, are necessary for the proper insertion  
406 of ESAT-6 into host membranes (Fig. 6A).

407 To conclude, here we propose that *M. marinum* controls the composition of the membrane of  
408 the MCV, and manipulates the host proteins of the vacuolin family, from their expression to their  
409 localization, to allow membrane damage, escape and survival inside the amoeba *D. discoideum*.

## 411 **MATERIALS AND METHODS**

### 412 ***D. discoideum* strains, culture and plasmids**

413 *D. discoideum* strains and plasmids are listed in Supplementary Table 1. Cells were axenically grown  
414 at 22°C in HL5c medium (Formedium) supplemented with 100 U/mL of penicillin and 100 µg/mL of  
415 streptomycin (Invitrogen). Plasmids were transfected into *D. discoideum* by electroporation and  
416 selected with the relevant antibiotic. Hygromycin was used at a concentration of 15 µg/mL, Blastidicin  
417 and G418 were used at a concentration of 5 µg/mL.

### 418 **Mycobacterial strains and culture**

419 The mycobacterial strains used in this study are listed in Table S1. Mycobacteria were grown in  
420 Middlebrook 7H9 (Difco) supplemented with 10% OADC (Becton Dickinson), 0.2% glycerol and  
421 0.05% Tween 80 (Sigma Aldrich) at 32°C in shaking culture at 150 r.p.m in the presence of 5 mm  
422 glass beads to prevent aggregation. Hygromycin was used at a concentration of 100 µg/mL (mCherry),  
423 kanamycin was used at a concentration of 50 µg/mL (GFP/DsRed expression) or 25 µg/mL (*lux*  
424 expression).

### 425 **Antibodies, reagents, western blotting and immunofluorescence**

426 Recombinant nanobodies with the Fc portion of rabbit IgG, which recognize specifically VacA or  
427 VacB were previously characterized (Bosmani et al., 2020). The other following antibodies were used:  
428 pan-vacuolin (Dr. M. Maniak (Jenne et al., 1998)), VatA (Dr. M. Maniak (Jenne et al., 1998)), p80  
429 (purchased from the Geneva Antibody Facility), cathepsin D (Dr. J. Garin (Jourmet et al., 1999)),  
430 ubiquitin FK2 (Enzo Life Sciences), and GFP (pAb from MBL Intl., mAb from Abmart). Goat anti-  
431 mouse or anti-rabbit IgG coupled to AlexaFluor 488, AlexaFluor 594, AlexaFluor 647 (Invitrogen) or  
432 to HRP (Brunschwig) were used as secondary antibodies.

433 After SDS-PAGE separation and transfer onto nitrocellulose membranes (Protran),  
434 immunodetection was performed as previously described (Schwarz et al., 2000) but with ECL Prime  
435 Blocking Reagent (Amersham Biosciences) instead of non-fat dry milk. Detection was performed with  
436 ECL Plus (Amersham Biosciences) using a Fusion Fx device (Vilber Lourmat). Quantification of band  
437 intensity was performed with ImageJ.

438 For immunofluorescence, infected *D. discoideum* cells were fixed with ultra-cold methanol (MeOH) at  
439 the indicated time points and immunostained as previously described (Hagedorn et al., 2006). Images  
440 were recorded with a Leica SP8 confocal microscope using a 63×1.4 NA oil immersion objectives.

#### 441 **Time-lapse imaging**

442 Infected cells were plated on a  $\mu$ -dish (iBIDI) in filtered HL5c. After adherence, either 1  $\mu$ m sections  
443 or time-lapse movies were taken with a spinning disc confocal system (Intelligent Imaging  
444 Innovations) mounted on an inverted microscope (Leica DMIRE2; Leica) using the 100×1.4 NA oil  
445 objective. Images were processed with ImageJ. Quantifications were performed manually. To stain  
446 acidic compartments, 1  $\mu$ M LysoSensor Green DND-189 (ThermoFisher), a pH-dependent probe that  
447 becomes more fluorescent in acidic compartments, was added to the infected cells. After 10 min  
448 incubation, excess dye was washed off and cells were imaged for a maximum of 30 min. To stain  
449 compartments with proteolytic activity, 50  $\mu$ g/mL DQ Green BSA (ThermoFisher), which releases  
450 fluorescent protein fragments upon proteolysis of the self-quenched BSA-associated Bodipy dye, was  
451 added to the infection sample one hour before imaging.

#### 452 **Infection assays**

453 Infections were performed as previously described (Hagedorn and Soldati, 2007; Arafah et al., 2013),  
454 with few modifications. After infection and phagocytosis, extracellular bacteria were washed off and  
455 attached infected cells were resuspended in filtered HL5c containing 5  $\mu$ g/mL of streptomycin and 5  
456 U/mL of penicillin to prevent growth of extracellular bacteria. Mock-infected cells were treated as  
457 above, but no bacteria were added.

458 To monitor both the host and pathogen during infection in a quantitative manner, cells were  
459 infected with GFP-expressing bacteria and analyzed by flow cytometry as previously described  
460 (Hagedorn and Soldati, 2007).

461 Growth of intracellular luminescent bacteria was measured as previously described (Arafah et  
462 al., 2013). Briefly, after infection with *luxABCDE*-expressing *M. marinum*, *D. discoideum* cells were  
463 counted and plated at different dilutions (from  $1.3 \times 10^5$  to  $3 \times 10^4$  cells/well) in a white F96 MicroWell  
464 plate (Nunc) covered with a gas permeable moisture barrier seal (Bioconcept). Luminescence was  
465 measured for 72 h with 1 h intervals with a Synergy Mx Monochromator-Based Multi-Mode  
466 Microplate Reader (Biotek) with constant 25°C.

467 To measure the proportion of intra and extracellular bacteria during the course of the infection, *D.*  
468 *discoideum* cells were infected, counted and plated in iBIDI 96-well  $\mu$ -plates as described in Mottet et  
469 al., 2021. Infected cells were imaged for 72 h with 1 h intervals with a 40x objective with the  
470 ImageXpress Micro XL high-content microscope (Molecular Devices). Different parameters,  
471 including cell number, intracellular and extracellular bacterial number and fluorescence intensity, were  
472 extracted using the MetaXpress software (Molecular Devices, Mottet et al., 2021). The proportion of  
473 intracellular vs. extracellular bacteria was plotted by normalizing the fluorescence intensity of intra or  
474 extracellular bacteria to the total bacterial fluorescence at each time point.

475 To quantify the percentage of high versus low expression of Vac-GFP KI during infection,  
476 cells were plated at 24 hpi in iBIDI 96-well  $\mu$ -plates and imaged with a 40x objective with the  
477 ImageXpress Micro XL high-content microscope. A cutoff of maximum intensity of 3000 was chosen  
478 to determine high and low expression based on the background intensity from non-infected cells. The  
479 proportion of high or low expression of each Vac-GFP was calculated for the population of non-  
480 infected cells (i.e., bystanders) and infected cells within the same well.

#### 481 **Phagocytic plaque assay**

482 Plaque formation of *D. discoideum* on a lawn of mycobacteria was monitored as previously described  
483 (Alibaud et al., 2011). 150-600  $\mu$ l of a  $5 \times 10^8$  mycobacteria/mL culture were centrifuged and  
484 resuspended in 1.2 mL 7H9 containing a  $1:10^5$  dilution of *K. pneumoniae* that had been grown  
485 overnight in LB. 50  $\mu$ L of this suspension were deposited on wells from a 24-well plate containing 2  
486 mL of 7H10-agar (without OADC). Serial dilutions of *D. discoideum* ( $10$ ,  $10^2$ ,  $10^3$  or  $10^4$  cells) were  
487 plated onto the bacterial lawn and plaque formation was monitored after 4-7 days at 25°C. To quantify  
488 cell growth on bacteria, a logarithmic growth score was assigned as follows: plaque formation up to a  
489 dilution of 10 cells received a score of 1000; when cells were not able to grow at lower dilutions, they  
490 obtained the corresponding lower scores of 100, 10 and 1.

#### 491 **Quantitative real-time PCR (qPCR)**

492 RNA from mock-infected cells or cells infected with *M. marinum* wt,  $\Delta$ RD1 or *M. smegmatis* was  
493 extracted at the indicated time points using the Direct-zol RNA MiniPrep kit (Zymo Research)  
494 following manufacturer's instructions. 1  $\mu$ g of RNA was retro-transcribed using the iScript cDNA  
495 Synthesis Kit and polydT primers (Biorad). The cDNA was amplified using the primers listed in S2  
496 Table and the SsoAdvanced universal SYBR Green supermix (Biorad). Amplimers for *vacA*, *vacB*,  
497 *vacC* and *gapdh* were detected on a CFX Connect Real-Time PCR Detection System (Biorad). The  
498 housekeeping gene *gapdh* was used for normalization. PCR amplification was followed by a DNA



499 melting curve analysis to confirm the presence of a single amplicon. Relative mRNA levels ( $2^{-\Delta\Delta C_t}$ )  
500 were determined by comparing first the PCR cycle thresholds ( $C_t$ ) for the gene of interest and *gapdh*  
501 ( $\Delta C$ ), and second  $C_t$  values in infected cells vs mock-infected cells ( $\Delta\Delta C$ ).

## 502 **RNAseq**

503 Following infection with GFP-expressing bacteria, infected and mock-infected cells were pelleted and  
504 resuspended in 500  $\mu$ l of HL5c, passed through 30  $\mu$ m filters and sorted by FACS (Beckman Coulter  
505 MoFlo Astrios). The gating was based on cell diameter (forward-scatter) and granularity (side-scatter).  
506 Of those, infected (GFP-positive) and non-infected (GFP-negative) sub-fractions were based on GFP  
507 intensity (FITC channel). Typically,  $\sim 5 \times 10^5$  cells of each fraction were collected for RNA isolation.  
508 RNA was isolated as above. Quality of RNA, libraries, sequencing and bioinformatic analysis were  
509 performed as previously described (Hanna et al., 2019).

## 510 **Cytosol-membrane separation and rESAT-6 incubation**

511  $10^9$  *D. discoideum* cells were washed in Sorensen-Sorbitol and resuspended in HESES buffer (HEPES  
512 20 mM, 250 mM Sucrose,  $MgCl_2$  5 mM, ATP 5 mM) supplemented with proteases inhibitors  
513 (cOmplete EDTA-free, Roche). Cells were homogenized in a ball homogenizer with 10  $\mu$ m clearance.  
514 The post-nuclear supernatant was diluted in HESES buffer and centrifuged at 35'000 rpm in a Sw60  
515 Ti rotor (Beckmann) for 1 hour at 4°C. The cytosol (supernatant) and membrane (MB, pellet) fractions  
516 were recovered. The protein concentration of the cytosol fraction was quantified by Bradford.  
517 Different quantities of membranes were tested (Fig S4), finally 400  $\mu$ g of membranes were incubated  
518 with 12  $\mu$ g of recombinant ESAT-6 (rESAT-6, BEI Resources, NR-49424) in HESES Buffer at pH 6,  
519 for 20 min at RT on a wheel. After ultracentrifugation at 45'000 rpm for 1 hour, 4°C, in a TLS-55  
520 rotor (Beckmann), membranes were separated into supernatant (SN) and pellet (P) fractions. Equal  
521 amounts of SN and P were loaded for western blotting.

## 522 **Detergent resistant membrane isolation**

523  $10^8$  *D. discoideum* cells were washed in Sorensen-Sorbitol and resuspended in 1 ml of cold Lysis  
524 Buffer (Tris-HCl pH 7.5 50 mM, NaCl 150 mM, Sucrose 50 mM, EDTA 5 mM, ATP 5 mM, DTT 1  
525 mM) with 1% Triton X-100 supplemented with proteases inhibitors. The lysate was then incubated at  
526 4°C on a rotating wheel for 30 min. After centrifugation (5 min, 13'000 rpm, table-top centrifuge,  
527 4°C), the supernatant (Triton Soluble Fraction, TSF) was collected and the pellet (Triton Insoluble  
528 Fraction, TIF) was resuspended in 200  $\mu$ l of cold Lysis buffer without Triton X-100. The TIF was  
529 mixed with 800  $\mu$ l of 80% sucrose (final concentration 65% sucrose), deposited at the bottom of an

530 ultracentrifuge tube and overlaid with 2 ml of 50% sucrose and 1 ml of 10% sucrose. The TIF was  
531 then centrifuged at 55'000 rpm in a Sw60 Ti rotor (Beckmann) for 2 h at 4°C. The Triton Insoluble  
532 Floating Fraction (TIFF) was collected, acetone precipitated and resuspended in Laemmli Buffer.  
533 Equivalent amounts of each fraction (TSF, TIF and TIFF) were loaded for western blotting.

## 534 ACKNOWLEDGEMENTS

535 We gratefully acknowledge Dr. P. Cosson (University of Geneva) and Dr. J. King (University of  
536 Sheffield) for discussions and suggestions and the staff of the Bioimaging Center for Microscopy, the  
537 FACS core facility and the IGE3 Genomics Platform at the Faculty of Sciences and Faculty of  
538 Medicine of the University of Geneva for their precious help. We thank Dr. D. Moreau and the  
539 ACCESS Geneva Imaging Facility of the University of Geneva for help with the high content  
540 microscopy experiments. This work was supported by Swiss National Science Foundation (SNF)  
541 grants 310030\_169386 and 310030\_188813 TS is a member of iGE3 (<http://www.ige3.unige.ch>).

## 542 REFERENCES

- 543 Aguilera, J., Karki, C.B., Li, L., Vazquez Reyes, S., Estevao, I., Grajeda, B.I., Zhang, Q., Arico, C.D.,  
544 Ouellet, H., and Sun, J. (2020). N  $\alpha$ -Acetylation of the virulence factor EsxA is required for  
545 mycobacterial cytosolic translocation and virulence. *J. Biol. Chem.* *295*, 5785–5794.
- 546 Alibaud, L., Rombouts, Y., Trivelli, X., Burguière, A., Cirillo, S.L.G., Cirillo, J.D., Dubremetz, J.-F.,  
547 Guérardel, Y., Lutfalla, G., and Kremer, L. (2011). A *Mycobacterium marinum* TesA mutant  
548 defective for major cell wall-associated lipids is highly attenuated in *Dictyostelium discoideum* and  
549 zebrafish embryos. *Mol. Microbiol.* *80*, 919–934.
- 550 Arafah, S., Kicka, S., Trofimov, V., Hagedorn, M., Andreu, N., Wiles, S., Robertson, B., and Soldati,  
551 T. (2013). Setting up and monitoring an infection of *Dictyostelium discoideum* with mycobacteria.  
552 *Methods Mol. Biol. Clifton NJ* *983*, 403–417.
- 553 Arellano-Reynoso, B., Lapaque, N., Salcedo, S., Briones, G., Ciocchini, A.E., Ugalde, R., Moreno, E.,  
554 Moriyón, I., and Gorvel, J.-P. (2005). Cyclic  $\beta$ -1,2-glucan is a brucella virulence factor required for  
555 intracellular survival. *Nat. Immunol.* *6*, 618–625.
- 556 Augenreich, J., and Briken, V. (2020). Host Cell Targets of Released Lipid and Secreted Protein  
557 Effectors of *Mycobacterium tuberculosis*. *Front. Cell. Infect. Microbiol.* *10*, 595029.
- 558 Augenreich, J., Arbues, A., Simeone, R., Haanappel, E., Wegener, A., Sayes, F., Chevalier, F.L.,  
559 Chalut, C., Malaga, W., Guilhot, C., et al. (2017). ESX-1 and phthiocerol dimycocerosates of  
560 *Mycobacterium tuberculosis* act in concert to cause phagosomal rupture and host cell apoptosis.  
561 *Cell. Microbiol.* *19*, e12726.

- 562 Babuke, T., and Tikkanen, R. (2007). Dissecting the molecular function of reggie/flotillin proteins.  
563 *Eur. J. Cell Biol.* 86, 525–532.
- 564 Barisch, C., Paschke, P., Hagedorn, M., Maniak, M., and Soldati, T. (2015). Lipid droplet dynamics at  
565 early stages of *Mycobacterium marinum* infection in *Dictyostelium*. *Cell. Microbiol.* 17, 1332–  
566 1349.
- 567 Barisch, C., Kalinina, V., Lefrançois, L.H., Appiah, J., López-Jiménez, A.T., and Soldati, T. (2018).  
568 Localization of all four ZnT zinc transporters in *Dictyostelium* and impact of ZntA and ZntB  
569 knockout on bacteria killing. *J. Cell Sci.* 131, jcs222000.
- 570 Bosmani, C., Leuba, F., Hanna, N., Bach, F., Burdet, F., Pagni, M., Hagedorn, M., and Soldati, T.  
571 (2020). Vacuolins and myosin VII are required for phagocytic uptake and phagosomal membrane  
572 recycling in *Dictyostelium discoideum*. *J. Cell Sci.* 133.
- 573 Boulais, J., Trost, M., Landry, C.R., Dieckmann, R., Levy, E.D., Soldati, T., Michnick, S.W.,  
574 Thibault, P., and Desjardins, M. (2010). Molecular characterization of the evolution of  
575 phagosomes. *Mol. Syst. Biol.* 6, 423.
- 576 Bozzaro, S., and Eichinger, L. (2011). The Professional Phagocyte *Dictyostelium discoideum* as a  
577 Model Host for Bacterial Pathogens. *Curr. Drug Targets* 12, 942–954.
- 578 Brandel, A., Aigal, S., Lagies, S., Schlimpert, M., Meléndez, A.V., Xu, M., Lehmann, A., Hummel,  
579 D., Fisch, D., Madl, J., et al. (2021). The Gb3-enriched CD59/flotillin plasma membrane domain  
580 regulates host cell invasion by *Pseudomonas aeruginosa*. *Cell. Mol. Life Sci. CMLS* 78, 3637–  
581 3656.
- 582 Cardenal-Muñoz, E., Arafah, S., López-Jiménez, A.T., Kicka, S., Falaise, A., Bach, F., Schaad, O.,  
583 King, J.S., Hagedorn, M., and Soldati, T. (2017). *Mycobacterium marinum* antagonistically  
584 induces an autophagic response while repressing the autophagic flux in a TORC1- and ESX-1-  
585 dependent manner. *PLOS Pathog.* 13, e1006344.
- 586 Cardenal-Muñoz, E., Barisch, C., Lefrançois, L.H., López-Jiménez, A.T., and Soldati, T. (2018).  
587 When Dicty Met Myco, a (Not So) Romantic Story about One Amoeba and Its Intracellular  
588 Pathogen. *Front. Cell. Infect. Microbiol.* 7.
- 589 Cosson, P., and Lima, W.C. (2014). Intracellular killing of bacteria: is *Dictyostelium* a model  
590 macrophage or an alien? *Cell. Microbiol.* 16, 816–823.
- 591 Cosson, P., and Soldati, T. (2008). Eat, kill or die: when amoeba meets bacteria. *Curr. Opin.*  
592 *Microbiol.* 11, 271–276.
- 593 Dermine, J.-F., Duclos, S., Garin, J., St-Louis, F., Rea, S., Parton, R.G., and Desjardins, M. (2001).  
594 Flotillin-1-enriched Lipid Raft Domains Accumulate on Maturing Phagosomes. *J. Biol. Chem.* 276,  
595 18507–18512.
- 596 Dunn, J.D., Bosmani, C., Barisch, C., Raykov, L., Lefrançois, L.H., Cardenal-Muñoz, E., López-  
597 Jiménez, A.T., and Soldati, T. (2018). Eat Prey, Live: *Dictyostelium discoideum* As a Model for  
598 Cell-Autonomous Defenses. *Front. Immunol.* 8.

- 599 Gao, L.-Y., Guo, S., McLaughlin, B., Morisaki, H., Engel, J.N., and Brown, E.J. (2004). A  
600 mycobacterial virulence gene cluster extending RD1 is required for cytolysis, bacterial spreading  
601 and ESAT-6 secretion. *Mol. Microbiol.* *53*, 1677–1693.
- 602 Goot, F.G. van der, Nhieu, G.T. van, Allaoui, A., Sansonetti, P., and Lafont, F. (2004). Rafts Can  
603 Trigger Contact-mediated Secretion of Bacterial Effectors via a Lipid-based Mechanism. *J. Biol.*  
604 *Chem.* *279*, 47792–47798.
- 605 Grassmé, H., Jendrossek, V., Riehle, A., von Kürthy, G., Berger, J., Schwarz, H., Weller, M.,  
606 Kolesnick, R., and Gulbins, E. (2003). Host defense against *Pseudomonas aeruginosa* requires  
607 ceramide-rich membrane rafts. *Nat. Med.* *9*, 322–330.
- 608 Hagedorn, M., and Soldati, T. (2007). Flotillin and RacH modulate the intracellular immunity of  
609 *Dictyostelium* to *Mycobacterium marinum* infection. *Cell. Microbiol.* *9*, 2716–2733.
- 610 Hagedorn, M., Neuhaus, E.M., and Soldati, T. (2006). Optimized fixation and immunofluorescence  
611 staining methods for *Dictyostelium* cells. *Methods Mol. Biol. Clifton NJ* *346*, 327–338.
- 612 Hagedorn, M., Rohde, K.H., Russell, D.G., and Soldati, T. (2009). Infection by tubercular  
613 mycobacteria is spread by nonlytic ejection from their amoeba hosts. *Science* *323*, 1729–1733.
- 614 Hanna, N., Burdet, F., Melotti, A., Bosmani, C., Kicka, S., Hilbi, H., Cosson, P., Pagni, M., and  
615 Soldati, T. (2019). Time-resolved RNA-seq profiling of the infection of *Dictyostelium discoideum*  
616 by *Mycobacterium marinum* reveals an integrated host response to damage and stress. *BioRxiv*  
617 590810.
- 618 Hanna, N., Koliwer-Brandl, H., Lefrançois, L.H., Kalinina, V., Cardenal-Muñoz, E., Appiah, J.,  
619 Leuba, F., Gueho, A., Hilbi, H., Soldati, T., et al. (2021). Zn<sup>2+</sup> Intoxication of *Mycobacterium*  
620 *marinum* during *Dictyostelium discoideum* Infection Is Counteracted by Induction of the Pathogen  
621 Zn<sup>2+</sup> Exporter CtpC. *MBio* *12*, e01313-20.
- 622 Janssen, K.-P., Rost, R., Eichinger, L., and Schleicher, M. (2001). Characterization of CD36/LIMPII  
623 Homologues in *Dictyostelium discoideum*. *J. Biol. Chem.* *276*, 38899–38910.
- 624 Jenne, N., Rauchenberger, R., Hacker, U., Kast, T., and Maniak, M. (1998). Targeted gene disruption  
625 reveals a role for vacuolin B in the late endocytic pathway and exocytosis. *J. Cell Sci.* *111*, 61–70.
- 626 de Jonge, M.I., Pehau-Arnaudet, G., Fretz, M.M., Romain, F., Bottai, D., Brodin, P., Honoré, N.,  
627 Marchal, G., Jiskoot, W., England, P., et al. (2007). ESAT-6 from *Mycobacterium tuberculosis*  
628 Dissociates from Its Putative Chaperone CFP-10 under Acidic Conditions and Exhibits Membrane-  
629 Lysing Activity. *J. Bacteriol.* *189*, 6028–6034.
- 630 Journet, A., Chapel, A., Jehan, S., Adessi, C., Freeze, H., Klein, G., and Garin, J. (1999).  
631 Characterization of *Dictyostelium discoideum* cathepsin D. *J Cell Sci* *112*, 3833–3843.
- 632 Kolonko, M., Geffken, A.C., Blumer, T., Hagens, K., Schaible, U.E., and Hagedorn, M. (2014).  
633 WASH-driven actin polymerization is required for efficient mycobacterial phagosome maturation  
634 arrest. *Cell. Microbiol.* *16*, 232–246.

- 635 Korhonen, J.T., Puolakkainen, M., Häivälä, R., Penttilä, T., Haveri, A., Markkula, E., and Lahesmaa,  
636 R. (2012). Flotillin-1 (Reggie-2) Contributes to Chlamydia pneumoniae Growth and Is Associated  
637 with Bacterial Inclusion. *Infect. Immun.* *80*, 1072–1078.
- 638 Lamrabet, O., Melotti, A., Burdet, F., Hanna, N., Perrin, J., Nitschke, J., Pagni, M., Hilbi, H., Soldati,  
639 T., and Cosson, P. (2020). Transcriptional Responses of Dictyostelium discoideum Exposed to  
640 Different Classes of Bacteria. *Front. Microbiol.* *11*.
- 641 Leon, J.D., Jiang, G., Ma, Y., Rubin, E., Fortune, S., and Sun, J. (2012). Mycobacterium tuberculosis  
642 ESAT-6 exhibits a unique membrane-interacting activity that is not found in its ortholog from non-  
643 pathogenic Mycobacterium smegmatis. *J. Biol. Chem.* jbc.M112.420869.
- 644 Lewis, K.N., Liao, R., Guinn, K.M., Hickey, M.J., Smith, S., Behr, M.A., and Sherman, D.R. (2003).  
645 Deletion of RD1 from Mycobacterium tuberculosis Mimics Bacille Calmette-Guérin Attenuation.  
646 *J. Infect. Dis.* *187*, 117–123.
- 647 López-Jiménez, A.T., Cardenal-Muñoz, E., Leuba, F., Gerstenmaier, L., Barisch, C., Hagedorn, M.,  
648 King, J.S., and Soldati, T. (2018). The ESCRT and autophagy machineries cooperate to repair  
649 ESX-1-dependent damage at the Mycobacterium-containing vacuole but have opposite impact on  
650 containing the infection. *PLOS Pathog.* *14*, e1007501.
- 651 López-Jiménez, A.T., Hagedorn, M., Delincé, M.J., McKinney, J., and Soldati, T. (2019). The  
652 developmental cycle of Dictyostelium discoideum ensures curing of a mycobacterial infection at  
653 both cell-autonomous level and by collaborative exclusion.
- 654 Morrow, I.C., and Parton, R.G. (2005). Flotillins and the PHB Domain Protein Family: Rafts, Worms  
655 and Anaesthetics. *Traffic* *6*, 725–740.
- 656 Morrow, I.C., Rea, S., Martin, S., Prior, I.A., Prohaska, R., Hancock, J.F., James, D.E., and Parton,  
657 R.G. (2002). Flotillin-1/Reggie-2 Traffics to Surface Raft Domains via a Novel Golgi-independent  
658 Pathway. *J. Biol. Chem.* *277*, 48834–48841.
- 659 Mottet, M., Bosmani, C., Hanna, N., Nitschke, J., Lefrançois, L.H., and Soldati, T. (2021). Novel  
660 Single-Cell and High-Throughput Microscopy Techniques to Monitor Dictyostelium discoideum-  
661 Mycobacterium marinum Infection Dynamics. *Methods Mol. Biol. Clifton NJ* *2314*, 183–203.
- 662 Neumann-Giesen, C., Falkenbach, B., Beicht, P., Claasen, S., LüErs, G., Stuermer, C.A.O., Herzog,  
663 V., and Tikkanen, R. (2004). Membrane and raft association of reggie-1/flotillin-2: role of  
664 myristoylation, palmitoylation and oligomerization and induction of filopodia by overexpression.  
665 *Biochem. J.* *378*, 509.
- 666 Otto, G.P., and Nichols, B.J. (2011). The roles of flotillin microdomains – endocytosis and beyond. *J.*  
667 *Cell Sci.* *124*, 3933–3940.
- 668 Pires, D., Marques, J., Pombo, J.P., Carmo, N., Bettencourt, P., Neyrolles, O., Lugo-Villarino, G., and  
669 Anes, E. (2016). Role of Cathepsins in *Mycobacterium tuberculosis* Survival in Human  
670 Macrophages. *Sci. Rep.* *6*, srep32247.

- 671 Russell, D.G. (2001). Mycobacterium tuberculosis: here today, and here tomorrow. *Nat. Rev. Mol.*  
672 *Cell Biol.* 2, 569–586.
- 673 Russell, D.G. (2007). Who puts the tubercle in tuberculosis? *Nat. Rev. Microbiol.* 5, 39–47.
- 674 Schwarz, E.C., Neuhaus, E.M., Kistler, C., Henkel, A.W., and Soldati, T. (2000). Dictyostelium  
675 myosin IK is involved in the maintenance of cortical tension and affects motility and phagocytosis.  
676 *J Cell Sci* 113, 621–633.
- 677 Solis, G.P., Hoegg, M., Munderloh, C., Schrock, Y., Malaga-Trillo, E., Rivera-Milla, E., and  
678 Stuermer, C.A.O. (2007). Reggie/flotillin proteins are organized into stable tetramers in membrane  
679 microdomains. *Biochem. J.* 403, 313.
- 680 Solomon, J.M., Leung, G.S., and Isberg, R.R. (2003). Intracellular Replication of Mycobacterium  
681 marinum within Dictyostelium discoideum: Efficient Replication in the Absence of Host Coronin.  
682 *Infect. Immun.* 71, 3578–3586.
- 683 Stajdohar, M., Rosengarten, R.D., Kokosar, J., Jeran, L., Blenkus, D., Shaulsky, G., and Zupan, B.  
684 (2017). dictyExpress: a web-based platform for sequence data management and analytics in  
685 Dictyostelium and beyond. *BMC Bioinformatics* 18, 291.
- 686 Stinear, T.P., Seemann, T., Harrison, P.F., Jenkin, G.A., Davies, J.K., Johnson, P.D.R., Abdellah, Z.,  
687 Arrowsmith, C., Chillingworth, T., Churcher, C., et al. (2008). Insights from the complete genome  
688 sequence of Mycobacterium marinum on the evolution of Mycobacterium tuberculosis. *Genome*  
689 *Res.* 18, 729–741.
- 690 Stuermer, C.A.O. (2011). Reggie/flotillin and the targeted delivery of cargo. *J. Neurochem.* 116, 708–  
691 713.
- 692 Tobin, D.M., and Ramakrishnan, L. (2008). Comparative pathogenesis of Mycobacterium marinum  
693 and Mycobacterium tuberculosis. *Cell. Microbiol.* 10, 1027–1039.
- 694 WHO World Health Organization WHO Global tuberculosis report 2021.
- 695 Wienke, D., Drengk, A., Schmauch, C., Jenne, N., and Maniak, M. (2006). Vacuolin, a flotillin/reggie-  
696 related protein from Dictyostelium oligomerizes for endosome association. *Eur. J. Cell Biol.* 85,  
697 991–1000.
- 698 Wong, D., Bach, H., Sun, J., Hmama, Z., and Av-Gay, Y. (2011). Mycobacterium tuberculosis protein  
699 tyrosine phosphatase (PtpA) excludes host vacuolar-H<sup>+</sup>-ATPase to inhibit phagosome  
700 acidification. *Proc. Natl. Acad. Sci. U. S. A.* 108, 19371–19376.
- 701 Xiong, Q., Lin, M., Huang, W., and Rikihisa, Y. (2019). Infection by Anaplasma phagocytophilum  
702 Requires Recruitment of Low-Density Lipoprotein Cholesterol by Flotillins. *MBio* 10.  
703  
704

## 705 **FIGURE LEGENDS**

706 **Figure 1: Vacuolin C is specifically induced upon *M. marinum* infection.** **A.** RNA-sequencing of  
707 wt cells infected with GFP-expressing *M. marinum* FACSsorted at different times post infection (hpi).  
708 The population of GFP-positive cells were FACSsorted prior to RNA extraction. Fold change RNA  
709 levels normalized to mock infected cells and compared to mock-infected cells (dashed line, N=3,  
710 \* $p \leq 0.05$ , \*\* $p \leq 0.01$ , \*\*\* $p \leq 0.001$ , \*\*\*\* $p \leq 0.0001$ ). **B.** RNA-sequencing of AX2 or DH1 *D. discoideum*  
711 wt cells in contact with the indicated bacterial strains for 4 hours, normalized and compared to mock  
712 cells (dashed line). The population of GFP-positive cells were FACSsorted prior to RNA extraction  
713 (N=3, \* $p \leq 0.05$ , \*\*\*\* $p \leq 0.0001$ ). Mm: *M. marinum*, Msmeg: *M. smegmatis*, Kp: *Klebsiella pneumoniae*,  
714 Bs: *Bacillus subtilis*, Ml: *Micrococcus luteus*. **C.** Quantitative RT-PCR of wt cells infected with wt or  
715  $\Delta$ RD1 *M. marinum*, or *M. smegmatis*. RNA levels normalized to GAPDH and to mock-infected cells.  
716 Cells were not sorted, the samples are heterogenous and contain both infected and non-infected cells  
717 (dashed line, mean  $\pm$  s.e.m., N=4, \* $p \leq 0.05$ , Mann-Whitney test). **D.** Lysate of non-sorted cell lines  
718 infected with wt or  $\Delta$ RD1 *M. marinum*, or mock-infected (NI), at different hpi, immunoblotted with  
719 the indicated antibodies, representative blot. **E.** Quantification of bands of Vac-GFPs in D.,  
720 normalized to Abp1 and NI cells (dashed line, N $\geq$ 3, \*\* $p \leq 0.01$ , one-way ANOVA). **G.** Representative  
721 Max projections of indicated cell lines infected with wt *M. marinum* expressing mCherry at 24 hpi, the  
722 same settings were used to image all cell lines. \*, infected cells; scale bar, 10  $\mu$ m. **F.** Percentage of  
723 infected or non-infected cells of the indicated cell lines with a low or high intensity GFP signal at 24  
724 hpi (mean  $\pm$  s.e.m., N=2, n $\geq$ 150 cells).

725 **Figure 2: Vacuolins gradually accumulate on the MCV throughout the infection.** **A.**  
726 Representative images of indicated Vac-GFP KI cell lines infected with wt *M. marinum* expressing  
727 mCherry. Arrows, broken MCVs; scale bar, 5  $\mu$ m. **B.** Quantification of A. representing the proportion  
728 of MCVs positive for each vacuolin (mean  $\pm$  s.e.m., N=4, n $\geq$ 200 MCVs). **C.** Quantification of A. Of  
729 all vac-positive MCVs, the percentage of MCVs showing a patchy or solid vacuolin-coat were counted  
730 (mean  $\pm$  s.e.m., N=4, n $\geq$ 200 MCVs). **D.** Same data as in B. 24 hpi time point, MCVs were separated  
731 into visibly broken or intact MCVs.

732 **Figure 3: Absence of vacuolins confers resistance to infection.** **A.** Different dilutions of wt or  
733 vacuolin KO cells were deposited on the indicated mycobacterial lawns mixed with *K. pneumoniae*.  
734 The plaquing score was determined using a logarithmic scale. Examples of plaques are shown in Fig.  
735 S2 (mean  $\pm$  s.e.m., N=4). **B.** Wt and  $\Delta$ ABC cells were infected with luminescent *M. marinum* wt or  
736  $\Delta$ RD1 and luminescence measured every hour for 72 hours in a plate reader (mean fold change  $\pm$   
737 s.e.m. N=3, two-way ANOVA, \*\*\*\* $p \leq 0.0001$ ). **C-E.** Wt and  $\Delta$ BC cells were infected with GFP-  
738 expressing *M. marinum*, cultured in shaking for 72 hours. At the indicated time points, fluorescence of

739 infected cells (**C.**), percentage of infected cells (**D.**) and total number of cells (**E.**) was measured by  
740 flow cytometry (mean  $\pm$  s.e.m., N=3, two-way ANOVA, \* $p \leq 0.05$ , \*\* $p \leq 0.01$ , \*\*\* $p \leq 0.005$ ,  
741 \*\*\*\* $p \leq 0.0001$ ).

742 **Figure 4. *M. marinum* does not reside in a more bactericidal compartment and is not released**  
743 **faster from vacuolin KO cells. A, C and E.** Wt and  $\Delta$ ABC cells infected with GFP-expressing *M.*  
744 *marinum*, fixed at the indicated time points and immunostained with antibodies against VatA (**A.**),  
745 CathD (**C.**) or p80 (**E.**). Representative images of wt cells at 12 hpi are shown on the left. Scale bar, 5  
746  $\mu$ m. The proportion of marker-positive bacteria for each strain and time point is shown on the right.  
747 ((mean  $\pm$  s.e.m., N=3,  $n \geq 150$  MCVs). **B and D.** Wt and  $\Delta$ ABC cells infected with mCherry-expressing  
748 *M. marinum* imaged at the indicated time points after incubation with Lysosensor Green (**B.**) for 10  
749 minutes or DQgreen (**D.**) for 1 hour before imaging. Representative images at 12 hpi are shown on the  
750 left. Scale bar, 5  $\mu$ m. The proportion of marker-positive bacteria for each strain and time point is  
751 shown on the right ((mean  $\pm$  s.e.m., N=3,  $n \geq 150$  MCVs, \* $p \leq 0.05$ , two-way ANOVA). **F-G.** Wt and  
752  $\Delta$ ABC cells infected with GFP-expressing *M. marinum* wt (**F.**) or  $\Delta$ RD1 (**G.**) and imaged every hour  
753 by high content microscopy in the presence of antibiotics to inhibit extracellular growth. The  
754 proportion of intracellular and extracellular bacteria was analyzed by MetaXpress and plotted for each  
755 time point (mean  $\pm$  s.e.m., N=3).

756 **Figure 5. *M. marinum* cannot access the cytosol in vacuolin KO cells. A.** Wt and  $\Delta$ ABC cells  
757 infected with mCherry-expressing *M. marinum* fixed at the indicated time points and immunostained  
758 with antibodies against Ubiquitin (FK2, mean  $\pm$  s.e.m., N=3,  $n \geq 150$  MCVs.). Representative images at  
759 24 hpi are shown on the left. Scale bar, 5  $\mu$ m. The proportion of marker-positive bacteria for each  
760 strain and time point is shown on the right. **B.** Same data as in A., of all Ub-positive MCVs, the  
761 percentage of MCVs showing a patchy or dotted Ubiquitin staining were counted (mean  $\pm$  s.e.m.). **C-D.**  
762 Similar quantifications as in A-B., but of wt or  $\Delta$ ABC cells expressing GFP-Vps32 infected with  
763 mCherry-expressing *M. marinum* wt and imaged by time-lapse microscopy (N=2). **E.** wt or  $\Delta$ ABC  
764 cells expressing GFP-Perilipin (Plin) infected with mCherry-expressing *M. marinum* wt and imaged at  
765 the indicated time points by time-lapse microscopy (mean  $\pm$  s.e.m., N=3,  $n \geq 150$  MCVs, two-way  
766 ANOVA, \*\* $p \leq 0.01$ ).

767 **Figure 6. Microdomains enriched in vacuolins and cholesterol facilitate ESAT-6 membrane**  
768 **insertion. A.** Recombinant ESAT6 (rESAT-6) was incubated with purified membranes of wt or  
769  $\Delta$ ABC cells, then membranes were ultracentrifuged and separated into supernatant (SN) and pellet (P)  
770 fractions. Identical amounts were loaded for each fraction and immunoblotted with the indicated  
771 antibodies. Left: 2 independent replicates are shown. Right: quantification of ESAT-6 bands  
772 normalized to lane background and wt (mean  $\pm$  s.e.m., N $\geq 3$ , unpaired *t*-test, \*\* $p \leq 0.01$ ). **B.** VacC-GFP



773 KI cells were mock infected or infected with wt *M. marinum* and, after 16 hpi, lysed in cold Triton X-  
774 100. The Triton soluble (TSF) and insoluble (TIF) fractions were recovered, and the floating fraction  
775 (TIFF) after floatation on a sucrose gradient. Equal amounts of each fraction were loaded and  
776 immunoblotted with the indicated antibodies. Left: Representative image of 3 independent  
777 experiments. Right: quantification of the fraction of VacC found in the TIF compared to the total  
778 (TSF+TIF) (mean  $\pm$  s.e.m., N=3, unpaired *t*-test, \*\* $p \leq 0.01$ ).

779 **Figure S1. Endogenous VacA and VacB are present on the MCV.** Representative images of wt  
780 cells infected with wt GFP-expressing *M. marinum*, fixed at indicated time points and immunostained  
781 with antibodies against endogenous VacA or VacB. Scale bar, 5  $\mu$ m.

782 **Figure S2. Plaque assays with vacuolin KO cells.** Representative images of plaque assays of Fig. 3A  
783 taken at day 5.

784 **Figure S3.** Model depicting different possible explanations for a resistance to infection. **A.** The  
785 normal infection course of *M. marinum* in wt cells. **B.** Five different mechanisms could explain the  
786 resistance of  $\Delta$ ABC cells (see main text).

787 **Figure S4. r-ESAT-6 binds membranes at pH 6, the pH measured in the MCV lumen. A-B.**  
788 Recombinant ESAT6 (rESAT-6) was incubated with purified membranes of wt cells at different pH  
789 (A.) or ratios (B.), then membranes were ultracentrifuged and separated into supernatant (SN) and  
790 pellet (P) fractions. Identical amounts were loaded for each fraction and immunoblotted with the  
791 indicated antibody. **C.** Wt cells were spinoculated with *M. marinum* or *M. marinum*-LID labelled with  
792 the fluorophores FITC (pH sensitive) and TRITC (pH insensitive). The ratio of both fluorophores was  
793 measured by plate reader (mean  $\pm$  s.e.m., N=2,  $n \geq 3$ ).

794 **Figure S5. r-ESAT-6 binds membranes at pH 6, the pH measured in the MCV lumen. A-B.** Vac-  
795 GFP KI (A) or Vac-GFP overexpressing (OE, B) cells were lysed in cold Triton X-100. The Triton  
796 soluble (TSF) and insoluble (TIF) fractions were recovered, and the floating fraction (TIFF) after  
797 floatation on a sucrose gradient. Equal amounts of each fraction were loaded and immunoblotted with  
798 the indicated antibodies. Representative images of 2 (A) or 3 (B) independent experiments.

Figure 1

bioRxiv preprint doi: <https://doi.org/10.1101/2021.11.16.468763>; this version posted November 16, 2021. The copyright holder for this preprint (which was not certified by peer review) is the author/funder, who has granted bioRxiv a license to display the preprint in perpetuity. It is made available under aCC-BY-NC-ND 4.0 International license.

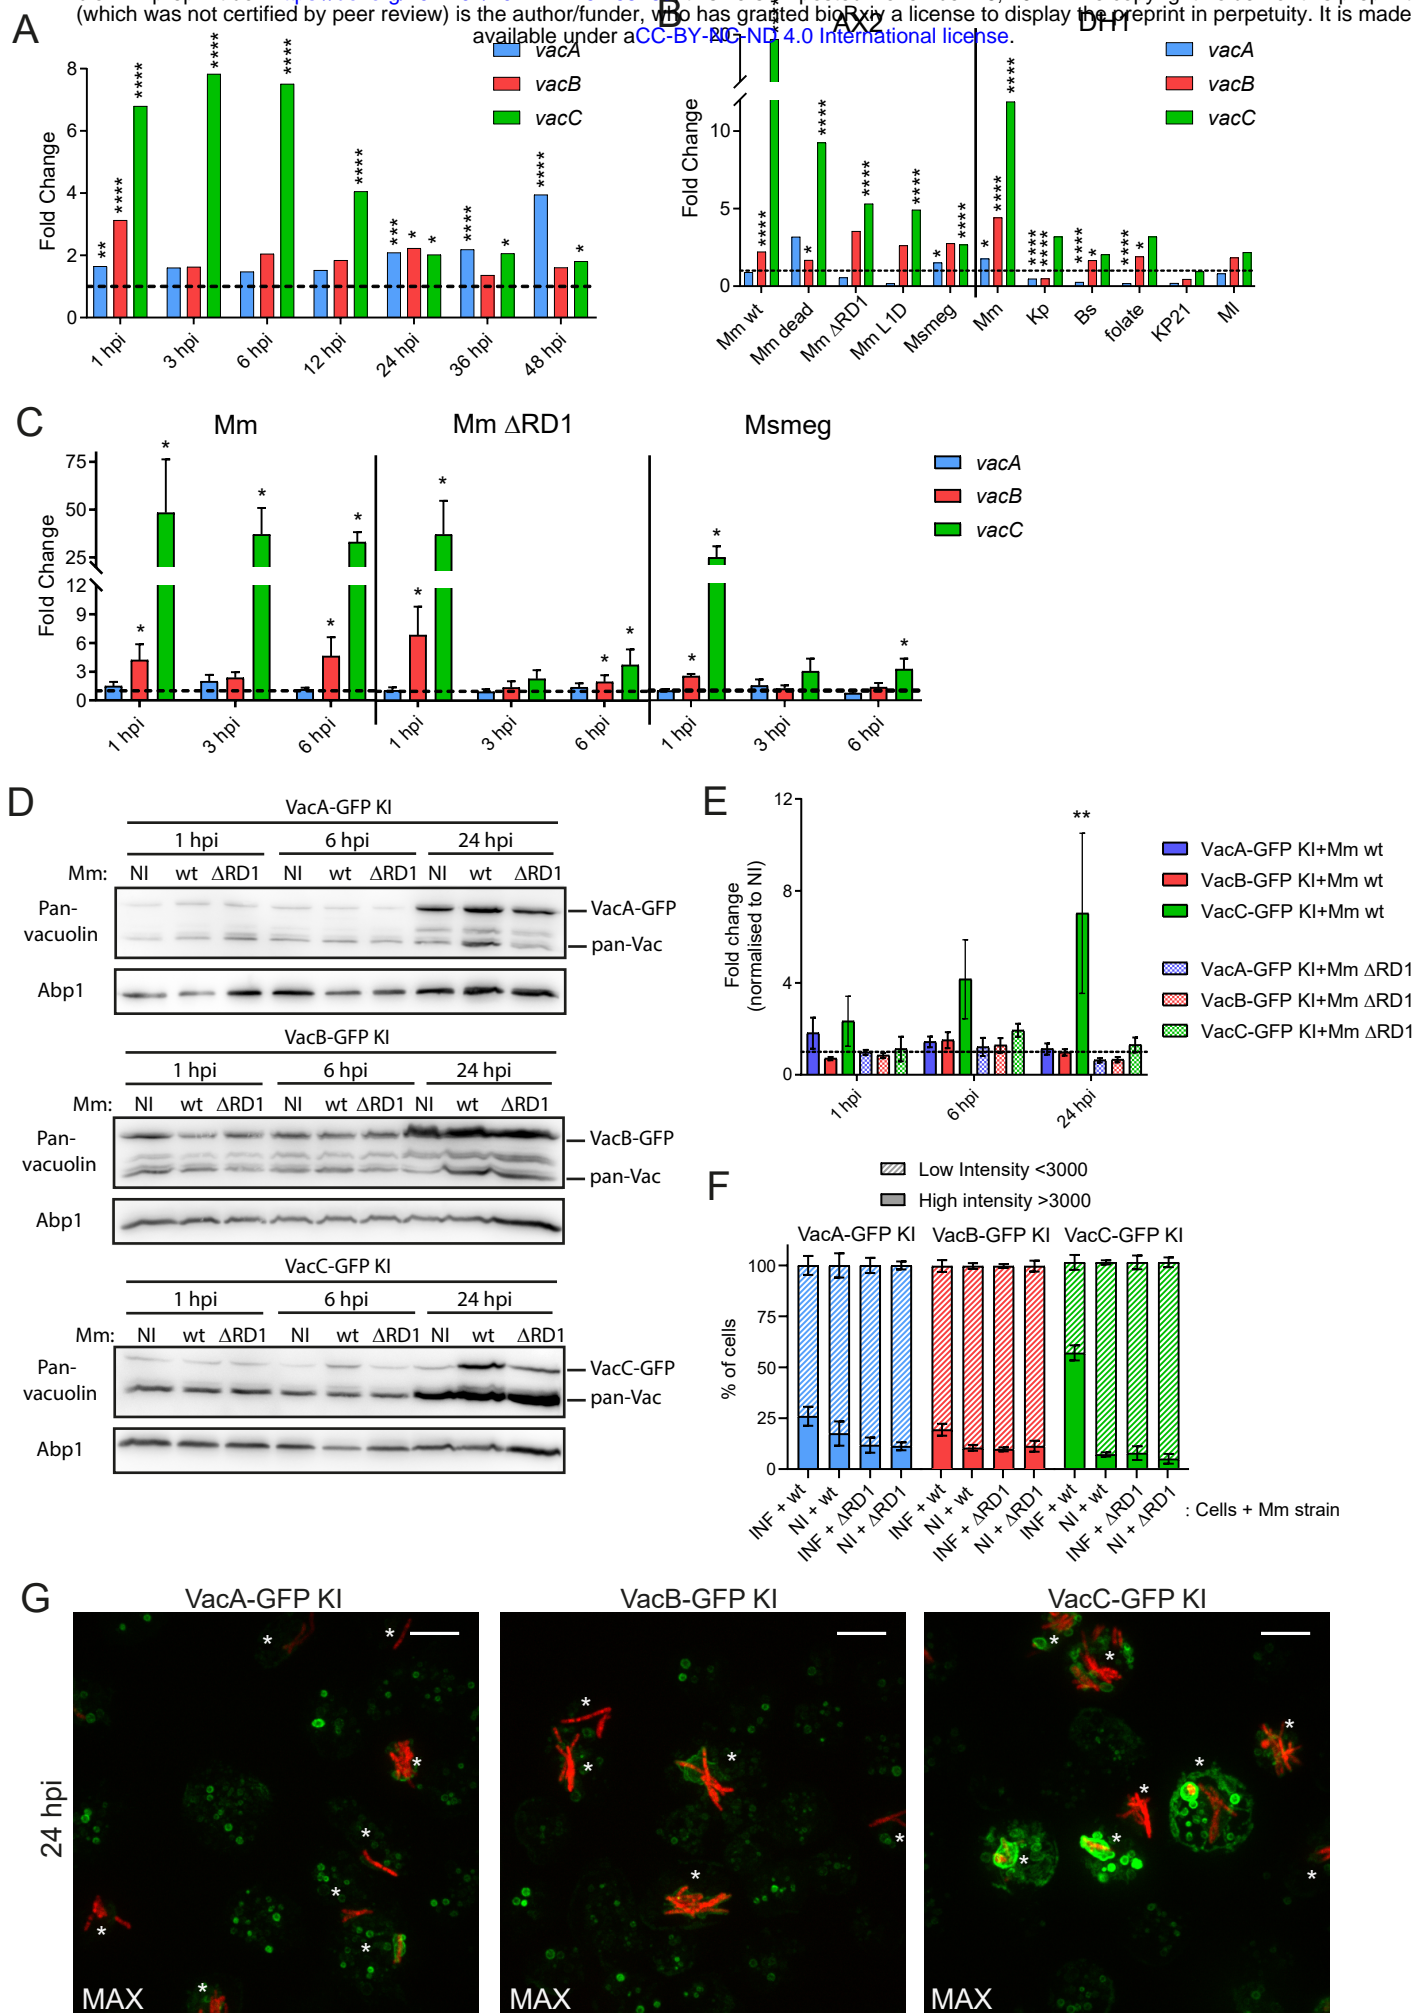

Bosmani et. al.,  
Figure 2

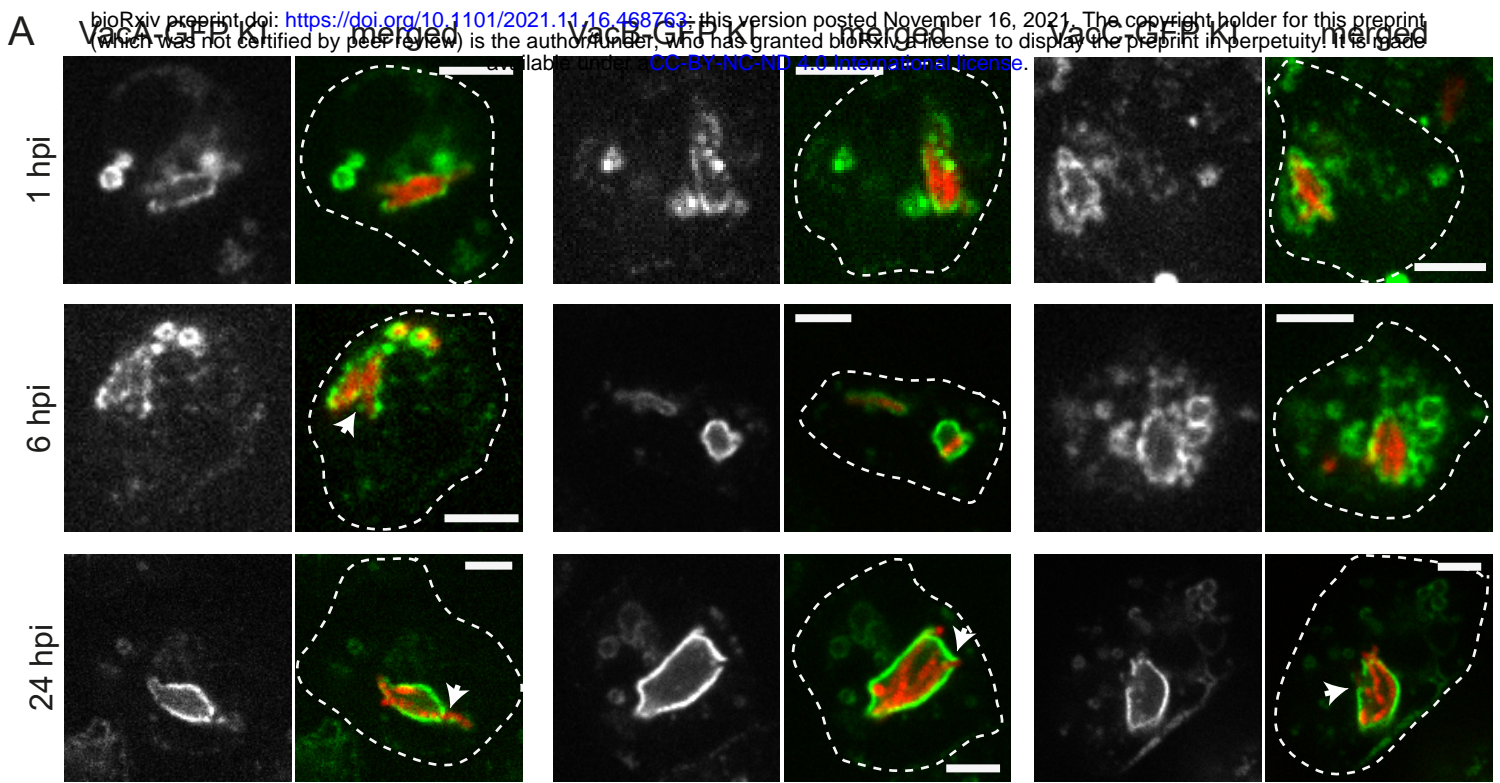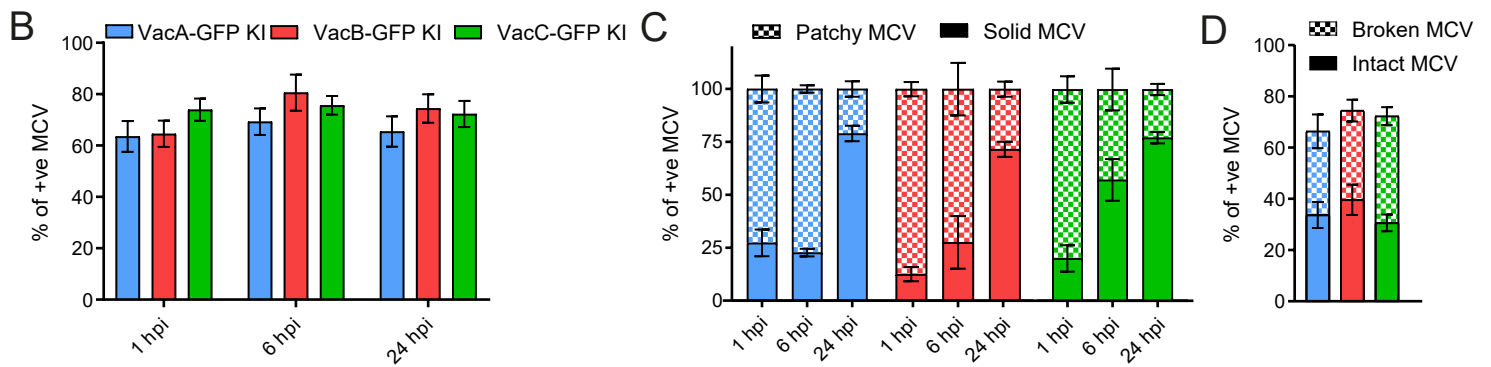

Figure 3

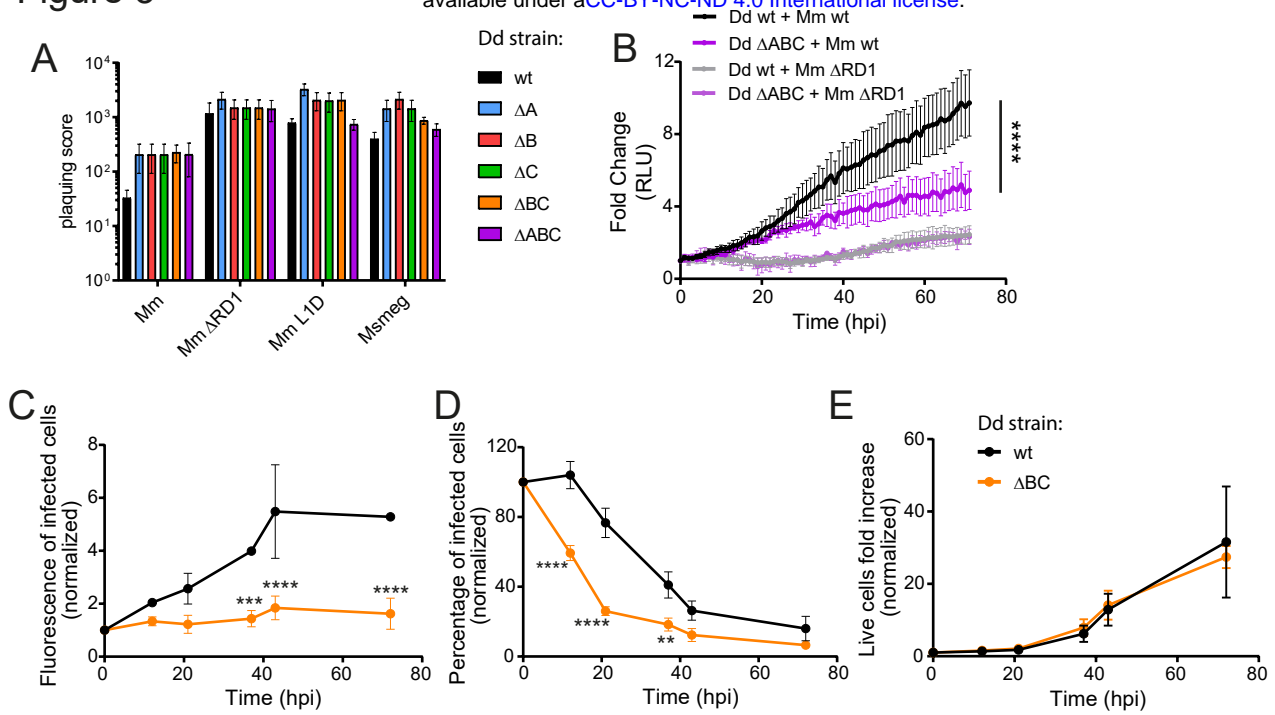

Figure 4

bioRxiv preprint doi: <https://doi.org/10.1101/2021.11.16.468763>; this version posted November 16, 2021. The copyright holder for this preprint (which was not certified by peer review) is the author/funder, who has granted bioRxiv a license to display the preprint in perpetuity. It is made available under aCC-BY-NC-ND 4.0 International license.

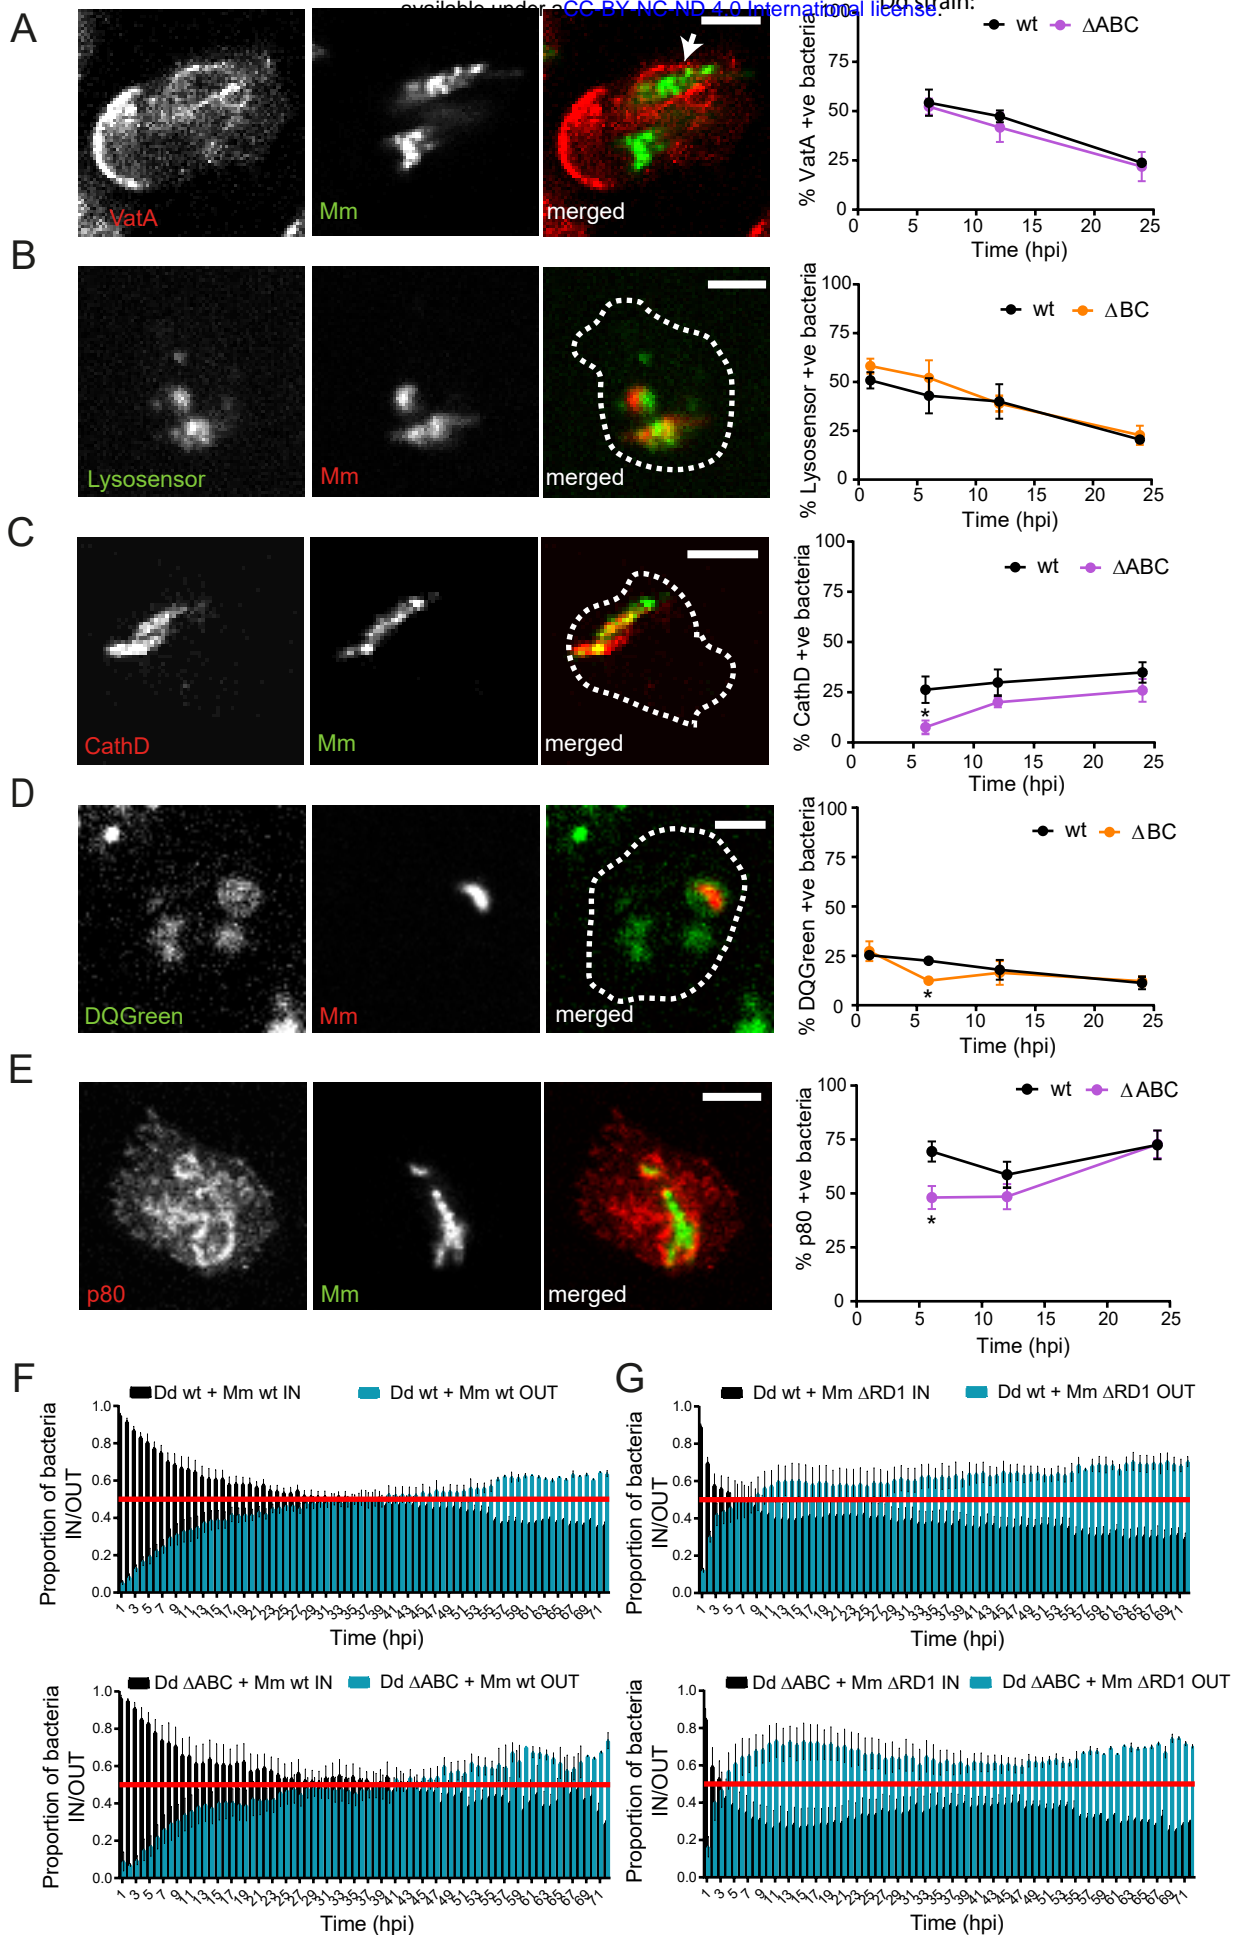

## Figure 5

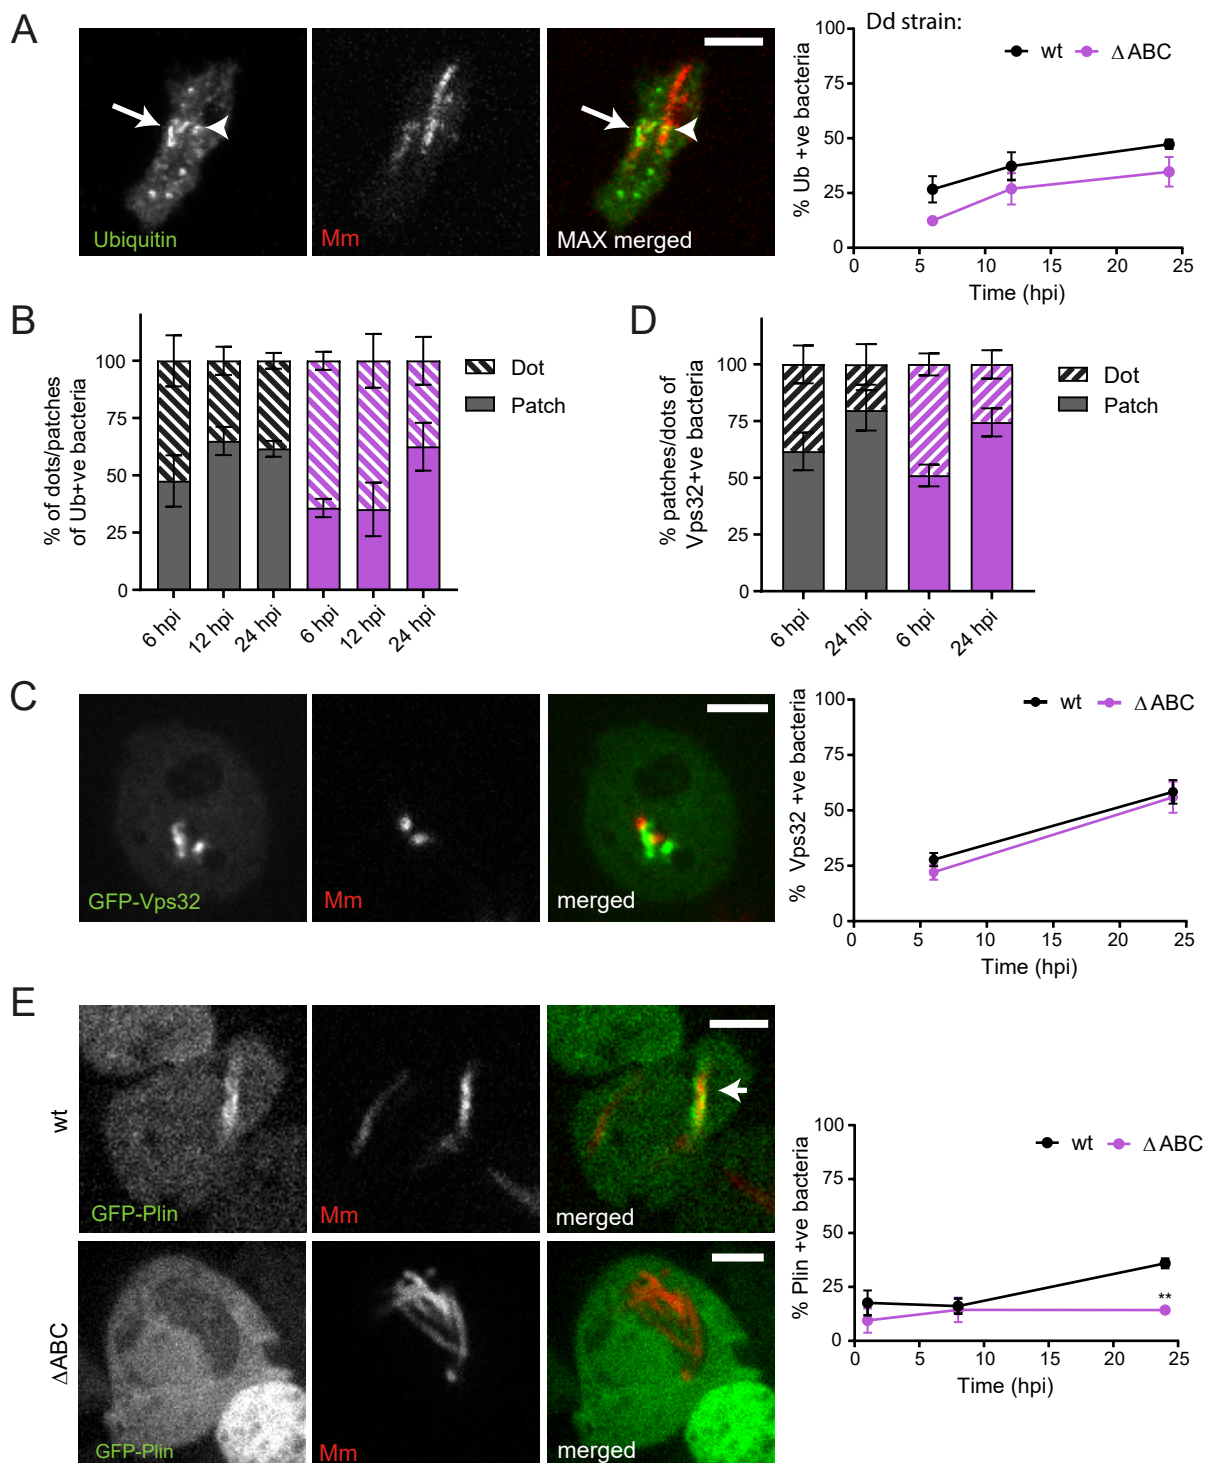

## Figure 6

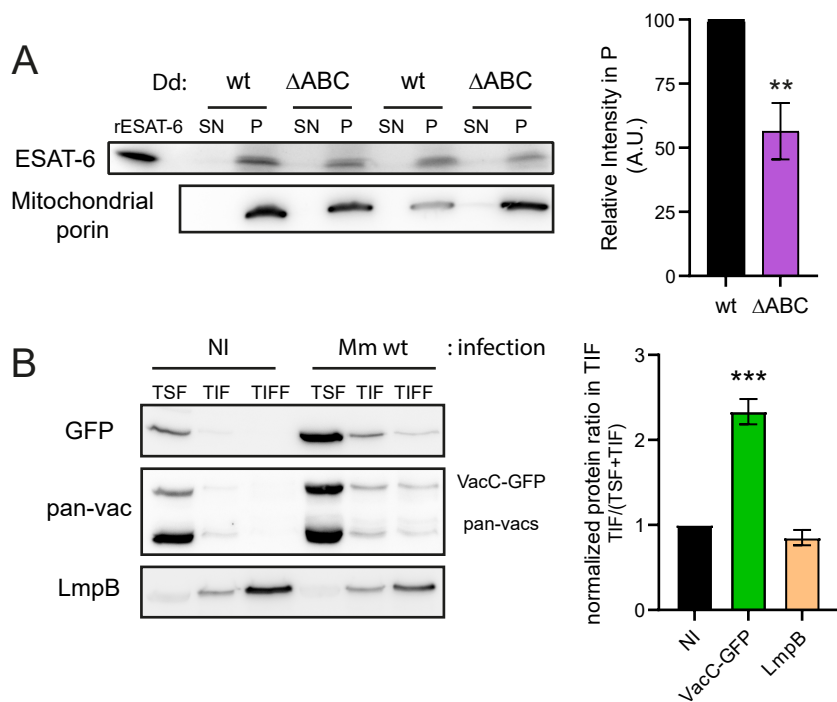

Source: https://www.biorxiv.org/content/10.1101/2021.11.16.468763v1.full.pdf
